# Supplementary material for: Systems impact of zinc chelation by the epipolythiodioxopiperazine dithiol gliotoxin inAspergillus fumigatus: a new direction in natural product functionality
Source: Royal Society of Chemistry journal article supplement (doi:10.1039/c8mt00052b), 2018-01-01
Supplement: c8mt00052b1.xlsx [file c8mt00052b1.xlsx]

## Sheet: Increased GT_Zn v GT
Table S1: Proteins with a significant increase in abundance in A. fumigatus ΔgliT when exposed to Zn2+/gliotoxin compared to gliotoxin alone (p < 0.05, log2(fold change) ≥ 1; Quantitative results)
Protein Function	Peptides	Unique peptides	Sequence coverage [%]	Mol. weight [kDa]	Q-value	Score	MS/MS Count	Mean Control	Mean GT	Mean Zn	Mean GT_Zn	Valid values Control	Valid values GT	Valid values Zn	Valid values GT_Zn	Student's T-test p-value	Log2(Fold Change)	Protein IDs	Majority protein IDs	Gene Name
Has domain(s) with predicted methyltransferase activity	18	18	59.6	32.215	0	204.47	89	22.5671	26.8764	22.5081	31.1125	2	3	1	3	0.00524674	4.2361	Afu2g11120	Afu2g11120	gtmA
Ortholog of A. nidulans FGSC A4 : AN3717, A. niger CBS 513.88 : An08g10700/MT-I, A. oryzae RIB40 : AO090003000398, Aspergillus wentii : Aspwe1_0033656 and Aspergillus sydowii : Aspsy1_0493104	13	13	58.9	27.4	0	110.3	68	21.5928	25.4216	21.5761	29.3208	1	3	1	3	0.00493698	3.8992	Afu6g12780	Afu6g12780	Afu6g12780
Fungal dehydrin-like protein that plays a role in oxidative, osmotic and pH stress responses;conserved DPR motif;cytoplasm and peroxisome localized;calcium and germination downregulated;transcript induced in neutrophil-exposed conidia	8	8	28	45.533	0	57.489	30	22.515	22.5778	25.156	25.0687	2	2	3	3	0.00202683	2.4909	Afu6g12180	Afu6g12180	dprB
Conidia-enriched protein of unknown function;transcript downregulated in response to voriconazole;hypoxia repressed protein	9	9	87.5	14.849	0	124.59	103	30.8581	28.1097	30.2424	30.5289	3	3	3	3	0.00115947	2.41917	Afu2g15290	Afu2g15290	Afu2g15290
Putative aldehyde reductase;higher expression in 48 h biofilm vs planktonic cells;repressed by gliotoxin exposure	18	18	60	35.489	0	118.61	81	27.0043	24.9556	28.3681	26.8412	3	3	3	3	0.016977	1.8856	Afu5g02020	Afu5g02020	Afu5g02020
Has domain(s) with predicted carbonate dehydratase activity, zinc ion binding activity	7	7	47.9	23.692	0	37.073	33	25.7533	24.4027	25.9734	26.0775	3	3	3	3	0.00417963	1.67477	Afu8g06554	Afu8g06554	Afu8g06554
Putative carbonic anhydrase;decreased conidiation in the mutant;hypoxia induced protein	12	12	44.6	30.827	0	95.349	67	27.6955	25.646	27.8425	27.2926	3	3	3	3	0.00295063	1.64657	Afu4g11250	Afu4g11250	cafA
Putative zinc-dependent alcohol dehydrogenase, involved in ethanol fermentation;predicted gene pair with adh1;protein induced by hydrogen peroxide;reacts with rabbit immunosera exposed to A. fumigatus conidia	30	30	84.9	37.18	0	323.31	309	29.6849	29.183	29.9886	30.8049	3	3	3	3	0.000358621	1.62193	Afu5g06240;Afu7g01010	Afu5g06240	alcC
Putative zinc-binding dehydrogenase family oxidoreductase;conidia-enriched protein	16	16	70.3	37.526	0	188.27	141	27.4235	27.8381	28.5283	29.3844	3	3	3	3	0.00178968	1.5462	Afu1g15610	Afu1g15610	Afu1g15610
Putative formaldehyde dehydrogenase;transcript up-regulated in conidia exposed to neutrophils	15	15	50.1	40.044	0	178.69	144	28.3803	27.4609	29.2148	29.0041	3	3	3	3	0.00271505	1.54317	Afu2g01040	Afu2g01040	Afu2g01040
Putative hydroxyacylglutathione hydrolase;conidia-enriched protein;transcript up-regulated in conidia exposed to neutrophils	10	10	34.1	27.316	0	49.251	53	26.1438	24.7903	26.202	26.2633	3	3	3	3	0.00391993	1.47297	Afu5g12840	Afu5g12840	Afu5g12840
Ortholog(s) have extracellular region localization	9	9	72.9	19.575	0	167.24	52	26.2045	26.3829	28.2899	27.628	3	3	3	3	0.00355573	1.2452	Afu3g00960	Afu3g00960	Afu3g00960
Putative coenzyme A transferase;transcript induced by exposure to human airway epithelial cells	14	14	53.7	58.145	0	90.591	71	26.4729	25.7731	27.4993	26.9799	3	3	3	3	0.00426532	1.20677	Afu8g05580	Afu8g05580	coaT
Ortholog of A. oryzae RIB40 : AO090012000815, Neosartorya fischeri NRRL 181 : NFIA_003390, Aspergillus clavatus NRRL 1 : ACLA_062150 and Aspergillus zonatus : Aspzo1_0135140	8	8	59.6	15.947	0	112.83	76	27.9532	27.2269	28.7776	28.4231	3	3	3	3	0.00342648	1.19623	Afu3g02253	Afu3g02253	Afu3g02253
Putative secreted protease;sedolisin with tripeptidyl-peptidase activity;predicted signal sequence for secretion;induced by growth on BSA as a sole nitrogen source	22	22	52.3	65.838	0	323.31	192	28.9082	28.4756	29.0672	29.6402	3	3	3	3	0.0034868	1.16463	Afu4g03490	Afu4g03490	Afu4g03490
Ortholog(s) have cytosol, nucleus localization	34	34	77.7	45.689	0	323.31	344	29.6911	29.1493	30.3867	30.3087	3	3	3	3	0.0101131	1.15943	Afu7g06420	Afu7g06420	Afu7g06420
Putative vacuolar carboxypeptidase;predicted signal sequence for secretion;transcript downregulated in response to voriconazole;induced by growth on BSA as a sole nitrogen source	11	11	22.9	62.054	0	87.309	76	27.0607	26.1326	27.2044	27.2719	3	3	3	3	0.00669586	1.1392	Afu3g07040	Afu3g07040	cps1
Methylcitrate synthase;catalyses the condensation of propionyl-CoA and oxaloacetate to methylcitrate;conidia-enriched protein;mutants killed more readily by alveolar macrophages and show decreased virulence in mice	17	17	48.2	51.411	0	69.01	52	25.3497	24.9535	26.0989	26.0762	3	3	3	3	0.0283857	1.1228	Afu6g03590	Afu6g03590	mcsA
Putative fumarylacetoacetate hydrolase:induced by L-tyrosine;immunoreactive protein;repressed by gliotoxin exposure	15	15	54.3	46.817	0	114.38	109	27.6483	26.7992	27.949	27.8923	3	3	3	3	0.0224038	1.0931	Afu2g04230	Afu2g04230	fahA
Ortholog(s) have 2 iron, 2 sulfur cluster binding, ferrous iron binding, iron-sulfur transferase activity	3	3	19.4	20.883	0	17.172	17	23.8836	24.1042	24.412	25.1448	3	3	3	3	0.0378823	1.04053	Afu4g06770	Afu4g06770	Afu4g06770
Ortholog of A. nidulans FGSC A4 : AN0362, A. fumigatus Af293 : Afu6g03560, A. niger CBS 513.88 : An10g01040, An01g06280 and A. oryzae RIB40 : AO090005000897	3	3	34.5	20.488	0	37.324	27	NaN	25.925	25.436	26.9627	0	2	3	3	0.0135649	1.03763	Afu6g00430	Afu6g00430	Afu6g00430
1,3-beta-glucanosyltransferase with a role in elongation of 1,3-beta-glucan chains;glycosylphosphatidylinositol (GPI)-anchored protein;constitutively expressed during hyphal growth;hypoxia induced protein	15	15	40.3	48.077	0	131.65	126	28.0101	27.9072	28.0262	28.9337	3	3	3	3	0.00257454	1.02647	Afu2g01170	Afu2g01170	gel1
Has domain(s) with predicted N-acetyltransferase activity	5	5	52.2	16.98	0	28.46	33	25.1454	24.689	25.5738	25.7123	3	3	3	3	0.0286053	1.02327	Afu3g00870	Afu3g00870	Afu3g00870

## Sheet: Unique to GT_Zn v GT
Table S1: Proteins uniquely detected in A. fumigatus ΔgliT when exposed to Zn2+/gliotoxin and not when treated with gliotoxin alone (Qualitative results)
Protein Function	Peptides	Unique peptides	Sequence coverage [%]	Mol. weight [kDa]	Q-value	Score	MS/MS Count	Mean Control	Mean GT	Mean Zn	Mean GT_Zn	Valid values Control	Valid values GT	Valid values Zn	Valid values GT_Zn	Protein IDs	Majority protein IDs	Gene Name
Ortholog of A. nidulans FGSC A4 : AN8093, AN12197, A. fumigatus Af293 : Afu5g12760, A. niger CBS 513.88 : An15g06460, An13g02370 and A. oryzae RIB40 : AO090012000187	5	5	13.3	59.014	0	14.264	7	24.257	NaN	24.0142	24.4004	1	0	3	3	Afu4g13910	Afu4g13910	Afu4g13910
Has domain(s) with predicted UDP-N-acetylmuramate dehydrogenase activity, flavin adenine dinucleotide binding, oxidoreductase activity and role in oxidation-reduction process	6	6	14.3	53.642	0	15.515	14	24.3092	NaN	24.5778	25.3282	2	0	3	3	Afu1g00980	Afu1g00980	Afu1g00980
Asp Putative alpha/beta hydrolase;encoded in the fma (fumagillin) secondary metabolite gene cluster	11	11	63.7	32.697	0	68.263	34	26.2172	NaN	25.8159	25.1574	3	0	3	3	Afu8g00380	Afu8g00380	fma-AT
Ortholog of A. nidulans AN1088;hypoxia induced protein;encoded in the fma (fumagillin) secondary metabolite gene cluster	10	10	74.5	18.142	0	84.108	34	26.6506	NaN	26.4175	25.0121	3	0	3	3	Afu8g00430	Afu8g00430	Afu8g00430
Putative iron-dependent oxygenase;encoded in the fma (fumagillin) secondary metabolite gene cluster	9	9	39.8	34.23	0	20.474	17	26.1014	NaN	25.4229	24.9077	3	0	3	3	Afu8g00480	Afu8g00480	Afu8g00480
Putative non-ribosomal peptide synthetase (NRPS) involved in ferricrocin siderophore biosynthesis;expression is up-regulated by iron starvation and downregulated under iron-replete conditions	5	5	1.6	522.41	0.0003962	6.3066	10	24.8492	NaN	24.9647	24.4371	2	0	2	3	Afu1g17200	Afu1g17200	sidC
Protein involved in autophagy;GFP-atg8 used as a marker of autophagosome delivery into the vacuole	3	3	17.8	13.738	0.00037189	4.6647	5	23.2346	NaN	23.4262	23.105	1	0	1	3	Afu1g07470	Afu1g07470	atg8
Has domain(s) with predicted serine-type peptidase activity and role in proteolysis	3	3	7.7	73.991	0	14.527	10	24.1233	NaN	24.133	24.7488	2	0	2	3	Afu1g17400	Afu1g17400	Afu1g17400
Ortholog(s) have structural constituent of ribosome activity and mitochondrial large ribosomal subunit localization	3	3	26.7	14.33	0	12.517	19	23.5124	NaN	23.6056	23.2299	3	0	2	3	Afu2g08520	Afu2g08520	Afu2g08520
Ortholog of A. nidulans FGSC A4 : AN6278, Neosartorya fischeri NRRL 181 : NFIA_087680, Aspergillus wentii : Aspwe1_0071673 and Aspergillus versicolor : Aspve1_0041153	4	4	21.7	35.241	0	42.525	7	24.6362	NaN	25.1233	24.6523	1	0	1	3	Afu2g12540	Afu2g12540	Afu2g12540
Has domain(s) with predicted carbon-sulfur lyase activity and role in metabolic process	10	10	69.2	16.299	0	30.318	32	25.4341	NaN	25.7196	25.8808	3	0	3	3	Afu3g01340	Afu3g01340	Afu3g01340
Ortholog of S. cerevisiae : YPR089W, A. nidulans FGSC A4 : AN11706, A. niger CBS 513.88 : An02g08390, A. oryzae RIB40 : AO090005000724 and Aspergillus wentii : Aspwe1_0037154	4	4	6.7	96.769	0.00037092	4.5856	10	24.1035	NaN	24.4591	24.201	2	0	1	3	Afu3g12450	Afu3g12450	Afu3g12450
Pyridoxal phosphate dependent enzyme;SrbA-regulated during hypoxia	11	11	49.4	41.229	0	37.099	23	25.4954	NaN	25.5797	25.5882	3	0	3	3	Afu3g14470	Afu3g14470	Afu3g14470
Putative secreted aminopeptidase;predicted signal sequence for secretion	3	3	10.8	43.127	0	6.5025	23	28.8373	NaN	29.0927	29.3536	1	0	1	3	Afu4g04210	Afu4g04210	lap1
Ortholog of A. nidulans FGSC A4 : AN1654, A. niger CBS 513.88 : An04g03610, Aspergillus wentii : Aspwe1_0034423 and Aspergillus sydowii : Aspsy1_0084030	3	3	29.9	17.743	0	12.289	14	23.7117	NaN	24.0055	24.7984	2	0	3	3	Afu4g08750	Afu4g08750	Afu4g08750
Has domain(s) with predicted oxidoreductase activity and role in metabolic process	4	4	33.7	25.971	0	10.551	9	23.0963	NaN	24.8025	23.1276	1	0	2	3	Afu5g14000	Afu5g14000	Afu5g14000
Ortholog(s) have extracellular region localization	3	3	23.1	22.933	0	8.6477	5	NaN	NaN	22.6878	23.1572	0	0	3	3	Afu6g04690	Afu6g04690	Afu6g04690
Ortholog of A. nidulans FGSC A4 : AN8402, A. oryzae RIB40 : AO090010000632, Neosartorya fischeri NRRL 181 : NFIA_054750, Aspergillus wentii : Aspwe1_0032492 and Aspergillus versicolor : Aspve1_0056791	4	4	23.3	23.536	0	9.2556	16	23.3344	NaN	23.8283	23.9735	3	0	3	3	Afu6g09090	Afu6g09090	Afu6g09090
Ortholog(s) have oxidoreductase activity, acting on CH-OH group of donors activity and cytosol, nucleus localization	9	9	47.4	37.66	0	87.37	28	24.8222	NaN	25.5104	25.0356	3	0	3	3	Afu7g00700	Afu7g00700	Afu7g00700
Ortholog of Aspergillus fumigatus A1163 : AFUB_080930	3	3	15.6	39.125	0.00039714	6.3513	6	NaN	NaN	NaN	23.5199	0	0	0	3	Afu8g06840	Afu8g06840	Afu8g06840
Ortholog(s) have GTPase activator activity	4	4	5	117.75	0	9.5003	6	23.6187	NaN	23.0082	23.1954	2	0	1	2	Afu1g12680	Afu1g12680	Afu1g12680
Has domain(s) with predicted hydrolase activity, zinc ion binding activity	2	2	22.7	13.485	0.00037965	5.1728	4	22.233	NaN	22.8199	23.0138	1	0	1	2	Afu7g01040	Afu7g01040	Afu7g01040
Putative alcohol dehydrogenase involved in ethanol metabolism;predicted gene pair with AFUA_6G11430 (aldA);increased expression in biofilm;induced by L-tyrosine;induced in neutrophil-exposed conidia;repressed by gliotoxin exposur	2	1	5.1	53.759	0.0003643	4.1762	24	23.1141	NaN	22.985	23.8697	2	0	1	2	Afu7g01000	Afu7g01000	Afu7g01000
Protein of unknown function;encoded in the fma (fumagillin) secondary metabolite gene cluster	5	5	35.4	16.054	0	34.477	19	25.3345	NaN	25.3453	24.4874	3	0	3	2	Afu8g00400	Afu8g00400	Afu8g00400
Ortholog of A. nidulans FGSC A4 : AN10070, A. niger CBS 513.88 : An01g06420, A. oryzae RIB40 : AO090005000908, Aspergillus wentii : Aspwe1_0049751 and Aspergillus sydowii : Aspsy1_0144393	3	3	24.4	25.061	0.00037693	5.0222	11	23.7369	NaN	23.4853	23.8416	2	0	1	2	Afu1g01790	Afu1g01790	Afu1g01790
Has domain(s) with predicted snoRNA binding activity and role in ribosome biogenesis, snRNA pseudouridine synthesis	5	5	13.7	73.665	0	50.555	13	24.3088	NaN	NaN	24.5978	1	0	0	2	Afu1g13880	Afu1g13880	Afu1g13880
Ortholog of A. nidulans FGSC A4 : AN6123, A. niger CBS 513.88 : An12g04060, A. oryzae RIB40 : AO090011000832, Aspergillus wentii : Aspwe1_0677357 and Aspergillus sydowii : Aspsy1_0058030	2	2	5.2	50.082	0.00038432	5.4872	7	22.4035	NaN	22.074	21.9661	1	0	1	2	Afu2g08730	Afu2g08730	Afu2g08730
Ortholog of A. nidulans FGSC A4 : AN10785, A. niger CBS 513.88 : An02g04170, A. oryzae RIB40 : AO090026000436, Aspergillus wentii : Aspwe1_0659662 and Aspergillus sydowii : Aspsy1_0151797	3	3	17.7	26.2	0	44.142	17	NaN	NaN	24.0964	23.1285	0	0	1	2	Afu2g12100	Afu2g12100	Afu2g12100
Ortholog(s) have phenylalanine-tRNA ligase activity, role in mitochondrial phenylalanyl-tRNA aminoacylation and mitochondrion localization	5	5	20.7	58.603	0	25.838	9	23.8061	NaN	24.359	24.2448	2	0	2	2	Afu2g13030	Afu2g13030	Afu2g13030
Has domain(s) with predicted NAD binding, catalytic activity, coenzyme binding, oxidoreductase activity, acting on the aldehyde or oxo group of donors, NAD or NADP as acceptor activity	2	2	11	38.573	0	6.9971	5	NaN	NaN	23.2067	23.3191	0	0	3	2	Afu3g00330	Afu3g00330	Afu3g00330
Has domain(s) with predicted S-adenosylmethionine-homocysteine S-methyltransferase activity	4	4	28.8	33.68	0	24.691	12	24.4711	NaN	24.5039	24.5096	3	0	3	2	Afu3g01320	Afu3g01320	Afu3g01320
Putative glutaminase;SrbA-regulated during hypoxia	2	2	3.6	92.757	0	7.6054	7	23.2307	NaN	23.2828	23.3105	1	0	2	2	Afu3g10910	Afu3g10910	Afu3g10910
Ortholog(s) have nucleus localization	7	7	9.9	115.31	0	14.081	13	23.5351	NaN	23.9433	23.555	2	0	1	2	Afu3g11020	Afu3g11020	Afu3g11020
Ortholog(s) have role in poly(A)+ mRNA export from nucleus and nuclear membrane, nuclear periphery, nuclear pore outer ring localization	2	2	2.7	149.8	0	8.5092	7	23.9657	NaN	NaN	23.6638	2	0	0	2	Afu4g05840	Afu4g05840	Afu4g05840
Ortholog of A. nidulans FGSC A4 : AN3625, A. niger CBS 513.88 : An01g08100, A. oryzae RIB40 : AO090009000332, Aspergillus wentii : Aspwe1_0216634 and Aspergillus sydowii : Aspsy1_0046675	4	4	17	43.287	0	8.3056	8	NaN	NaN	NaN	24.641	0	0	0	2	Afu4g12610	Afu4g12610	Afu4g12610
Homoaconitase;alpha-aminoadipate pathway	2	2	12.5	34.707	0.0031153	3.0742	4	NaN	NaN	21.8597	21.8445	0	0	1	2	Afu4g12630	Afu4g12630	acoB
Ortholog(s) have DNA replication origin binding, chromatin binding, single-stranded DNA binding, single-stranded DNA-dependent ATP-dependent DNA helicase activity	3	3	5.3	79.911	0.0031326	3.1741	9	20.8709	NaN	NaN	21.1173	1	0	0	2	Afu5g02520	Afu5g02520	Afu5g02520
Putative cell wall glucanase;induced by exposure to artemisinin	4	4	17.2	69.619	0.001423	3.6314	4	NaN	NaN	23.4244	23.3804	0	0	1	2	Afu5g08780	Afu5g08780	bgt3
Pentatricopeptide repeat protein;transcript induced by exposure to human airway epithelial cells	10	10	8.9	139.37	0	15.962	12	24.1375	NaN	24.1537	24.4652	3	0	2	2	Afu5g10660	Afu5g10660	Afu5g10660
Ortholog(s) have extracellular region localization	2	2	7.9	32.592	0.0003876	5.7552	5	22.4101	NaN	22.497	22.2808	3	0	1	2	Afu5g10930	Afu5g10930	Afu5g10930
Ortholog(s) have cytosol, nucleus localization	7	7	24.2	39.746	0	15.28	5	24.195	NaN	24.4061	24.33	2	0	1	2	Afu5g12242	Afu5g12242	Afu5g12242
Ortholog of A. nidulans FGSC A4 : AN5317, A. oryzae RIB40 : AO090003000248, AO090010000078, Neosartorya fischeri NRRL 181 : NFIA_047440 and Aspergillus versicolor : Aspve1_0031634	4	4	25.7	33.996	0	34.673	10	23.5674	NaN	NaN	23.8695	1	0	0	2	Afu6g00280	Afu6g00280	Afu6g00280
Ortholog(s) have mRNA binding activity, role in mRNA splice site selection and U1 snRNP, U2-type prespliceosome, cytosol localization	4	4	25.4	31.211	0	14.864	10	23.0257	NaN	23.0375	22.6659	3	0	2	2	Afu6g09010	Afu6g09010	Afu6g09010
Ortholog(s) have endoplasmic reticulum, fungal-type vacuole membrane localization	4	4	16.6	31.674	0	7.7357	5	23.1083	NaN	23.6307	23.0525	2	0	1	2	Afu7g04230	Afu7g04230	Afu7g04230
Ortholog(s) have nucleolus localization	5	5	11.7	58.985	0	11.584	10	NaN	NaN	NaN	23.3622	0	0	0	2	Afu8g04400	Afu8g04400	Afu8g04400
Ortholog of A. nidulans FGSC A4 : AN1461, A. niger CBS 513.88 : An16g08470, A. oryzae RIB40 : AO090023000334, Aspergillus wentii : Aspwe1_0043883 and Aspergillus sydowii : Aspsy1_0145261	2	2	11.2	58.265	0.00071454	3.7539	5	23.1864	NaN	NaN	23.2391	2	0	0	2	Afu8g04530	Afu8g04530	Afu8g04530
Putative chitin synthase	4	4	4.8	133.52	0.00037779	5.0984	2	NaN	NaN	NaN	24.3177	0	0	0	2	Afu8g05630	Afu8g05630	chsF

## Sheet: Decreased GT_Zn v GT
Table S1: Proteins with a significant decrease in abundance in A. fumigatus ΔgliT when exposed to Zn2+/gliotoxin compared to gliotoxin alone (p < 0.05, -log2(fold change) ≤ -1; Quantitative results)
Protein Function	Peptides	Unique peptides	Sequence coverage [%]	Mol. weight [kDa]	Q-value	Score	MS/MS Count	Mean Control	Mean GT	Mean Zn	Mean GT_Zn	Valid values Control	Valid values GT	Valid values Zn	Valid values GT_Zn	Student's T-test p-value	-Log2(Fold Change)	Protein IDs	Majority protein IDs	Gene Name
Putative cysteine synthase B;transcript induced by exposure to human airway epithelial cells	28	28	61	58.353	0	323.31	174	28.9574	29.9508	27.7922	27.3674	3	3	3	3	0.00128619	-2.5834	Afu4g03930	Afu4g03930	Afu4g03930
Alpha-ketoglutarate-dependent taurine dioxygenase;SrbA-regulated during hypoxia	6	6	20.2	42.294	0	27.996	20	25.4824	25.2454	23.8925	23.5083	3	3	3	3	0.0358171	-1.7371	Afu7g06030	Afu7g06030	Afu7g06030
GDP-mannose pyrophosphorylase A;repressed by exposure to artemisinin	15	15	47.6	48.286	0	82.953	84	28.1051	28.5008	27.2231	26.8845	3	3	3	3	0.000753825	-1.61633	Afu6g07620	Afu6g07620	Afu6g07620
Ortholog(s) have mRNA binding, single-stranded DNA binding, translation regulator activity and role in positive regulation of translation	9	9	66.1	18.54	0	95.594	116	27.4099	27.5862	26.1948	26.2484	3	3	3	3	0.0214934	-1.3379	Afu1g07630	Afu1g07630	Afu1g07630
Has domain(s) with predicted ATP binding, nucleoside-triphosphatase activity, nucleotide binding activity	13	13	22.3	102.92	0	37.197	43	24.9975	25.5479	24.4265	24.433	3	3	3	3	0.012547	-1.1149	Afu8g00780	Afu8g00780	Afu8g00780
Ortholog(s) have unfolded protein binding activity, role in mitochondrial proton-transporting ATP synthase complex assembly and mitochondrion localization	7	7	26.5	37.604	0	45.713	29	24.6325	25.3148	23.9398	24.2747	3	3	3	3	0.0177284	-1.04017	Afu7g04670	Afu7g04670	Afu7g04670
Asp Putative acetyl-coenzyme A acetyltransferase;protein induced by hydrogen peroxide;higher expression in 48 h biofilm vs planktonic cells;SrbA-regulated during hypoxia	28	28	93	41.242	0	323.31	403	31.3823	31.8928	30.1857	30.867	3	3	3	3	0.00199221	-1.02577	Afu8g04000	Afu8g04000	erg10B
Ortholog of A. nidulans FGSC A4 : AN1460, A. niger CBS 513.88 : An16g08480, A. oryzae RIB40 : AO090023000335, Aspergillus wentii : Aspwe1_0043882 and Aspergillus sydowii : Aspsy1_0145844	10	10	50	33.354	0	70.656	54	24.5491	26.024	24.698	25.0024	3	3	3	3	0.0226546	-1.02163	Afu8g04510	Afu8g04510	Afu8g04510
Translational initiation factor 2 beta	13	13	43.5	33.915	0	71.865	41	26.2779	26.5934	26.2743	25.5729	3	3	3	3	0.00981266	-1.0205	Afu3g08600	Afu3g08600	Afu3g08600
Putative woronin body protein;hypoxia repressed protein	13	13	32	61.406	0	61.579	87	26.7737	27.7496	26.335	26.7326	3	3	3	3	0.000238577	-1.01703	Afu5g08830	Afu5g08830	hexA

## Sheet: Not detected GT_Zn v GT
Table S1: Proteins not detected in A. fumigatus ΔgliT when exposed to Zn2+/gliotoxin and present in gliotoxin-only treatment (Qualitative results)
Protein Function	Peptides	Unique peptides	Sequence coverage [%]	Mol. weight [kDa]	Q-value	Score	MS/MS Count	Mean Control	Mean GT	Mean Zn	Mean GT_Zn	Valid values Control	Valid values GT	Valid values Zn	Valid values GT_Zn	Protein IDs	Majority protein IDs	Gene Name
Ortholog(s) have role in cellular response to cold, cellular response to drug, cellular response to osmotic stress	2	2	11.6	23.398	0.00039557	6.2698	9	23.3113	22.5242	22.3533	NaN	3	3	3	0	Afu7g02190	Afu7g02190	Afu7g02190
Ortholog of Aspergillus brasiliensis : Aspbr1_0199026, Neosartorya fischeri NRRL 181 : NFIA_055440, NFIA_112700, Aspergillus fumigatus A1163 : AFUB_075800 and Aspergillus clavatus NRRL 1 : ACLA_006680	3	3	17.3	19.702	0	8.0897	5	NaN	23.9091	NaN	NaN	0	3	0	0	Afu6g09745	Afu6g09745	Afu6g09745
Putative phosphatidylinositol phospholipase C;transcript induced by exposure to human airway epithelial cells	3	3	6.5	54.63	0.003111	3.0468	7	23.0741	23.1881	NaN	NaN	2	3	0	0	Afu4g12000	Afu4g12000	Afu4g12000
Putative non-ribosomal peptide synthetase (NRPS);mutants display increased virulence in G. mellonella and in mice;required for wild-type hyphal growth and conidial germination	3	3	0.3	940.2	0.004446	2.8183	12	26.6488	26.8502	NaN	NaN	2	3	0	0	Afu5g12730	Afu5g12730	nrps8
Ortholog(s) have role in ER to Golgi vesicle-mediated transport and ER to Golgi transport vesicle, fungal-type vacuole membrane, integral component of Golgi membrane, integral component of endoplasmic reticulum membrane localization	6	6	21.4	45.24	0	14.327	14	25.0929	25.0888	NaN	NaN	3	3	0	0	Afu2g16800	Afu2g16800	Afu2g16800
Allergen Asp f 2;expressed in alkaline zinc-limiting conditions;shares a divergent promoter with zrfC;higher expression in biofilm vs planktonic cells;fibrinogen binding protein;signal peptide and 4 possible glycosylation sites	7	7	39.8	33.357	0	59.086	20	25.9932	26.0189	24.0046	NaN	2	3	1	0	Afu4g09580	Afu4g09580	aspf2
Ortholog(s) have role in DNA repair, establishment or maintenance of cell polarity regulating cell shape, histone deacetylation and negative regulation of antisense RNA transcription, <a href=#GOsection>more</a>	5	5	20.9	38.333	0	11.323	12	23.7421	23.9566	23.5634	NaN	3	3	1	0	Afu4g10660	Afu4g10660	Afu4g10660
Ortholog(s) have pyruvate dehydrogenase (acetyl-transferring) kinase activity, role in carbon utilization, negative regulation of catalytic activity, peptidyl-serine phosphorylation and mitochondrion localization	5	5	15.2	50.571	0	11.399	13	23.5347	23.6464	23.6137	NaN	2	3	1	0	Afu5g03240	Afu5g03240	Afu5g03240
Ortholog of A. nidulans FGSC A4 : AN4732, A. niger CBS 513.88 : An14g03950, A. oryzae RIB40 : AO090010000468, Aspergillus wentii : Aspwe1_0439775 and Aspergillus terreus NIH2624 : ATET_07636	3	3	15	28.761	0	16.68	8	23.6427	24.2036	22.7945	NaN	3	3	1	0	Afu5g10730	Afu5g10730	Afu5g10730
Ortholog(s) have double-stranded telomeric DNA binding activity, role in telomere maintenance and nuclear chromatin, nuclear chromosome, telomeric region localization	4	4	7.1	91.421	0	11.095	7	23.2009	23.3782	NaN	NaN	2	3	0	0	Afu5g11470	Afu5g11470	Afu5g11470
Ortholog(s) have tRNA methyltransferase activity, role in tRNA methylation, wybutosine biosynthetic process and cytosol, mitochondrion, nucleus localization	2	2	2.4	114.41	0.000387	5.708	7	22.6536	22.8172	NaN	NaN	2	3	0	0	Afu5g11670	Afu5g11670	Afu5g11670
Ortholog(s) have mRNA binding activity, role in cytoplasmic translation and cytoplasm, polysomal ribosome localization	5	4	19.2	40.157	0	8.7226	11	24.7203	24.6451	24.3786	NaN	2	3	3	0	Afu5g13930	Afu5g13930	Afu5g13930
Low affinity plasma membrane zinc transporter;induced by zinc depletion, ZafA-dependent;overexpression decreases zinc uptake, heme biosynthesis and triacetylfusarinine C (TAFC) siderophore production;induced in neutrophil-exposed conidia	3	3	11.9	38.659	0	7.581	12	23.0138	22.4138	NaN	NaN	3	2	0	0	Afu2g03860	Afu2g03860	zrfB
Ortholog(s) have cell division site, cytosol, nucleus localization	11	11	21.6	77.03	0	24.26	17	24.3633	23.8343	24.6494	NaN	2	2	3	0	Afu3g12800	Afu3g12800	Afu3g12800
Predicted O-methyltransferase, encoded in the putative gliotoxin biosynthetic gene cluster	4	4	12.3	48.431	0	9.4714	5	NaN	23.9558	NaN	NaN	0	2	0	0	Afu6g09680	Afu6g09680	gliM
Ortholog(s) have peptidase activator activity, proteasome binding activity	3	3	2.4	222.75	0.00037509	4.913	5	NaN	21.9636	NaN	NaN	0	2	0	0	Afu4g11290	Afu4g11290	Afu4g11290
G protein-coupled receptor gamma subunit;required for gliotoxin production	2	2	25.6	10.31	0.0014119	3.4712	3	22.4208	22.4968	NaN	NaN	1	2	0	0	Afu1g05210	Afu1g05210	gpgA
Ortholog(s) have cytosol, nucleus localization	3	3	16.1	39.411	0	37.315	13	24.0606	23.8919	24.0091	NaN	2	2	2	0	Afu1g06630	Afu1g06630	Afu1g06630
Ortholog(s) have structural constituent of ribosome activity	3	3	34.5	13.339	0	15.273	8	24.5693	24.6594	25.2677	NaN	3	2	2	0	Afu2g02270	Afu2g02270	Afu2g02270
Ortholog(s) have small-subunit processome localization	7	7	16.7	68.31	0	21.743	15	23.634	23.6543	23.4853	NaN	2	2	1	0	Afu2g05930	Afu2g05930	Afu2g05930
ATP-dependent RNA helicase	3	3	5.4	70.436	0.0086522	2.314	3	NaN	27.3475	NaN	NaN	0	2	0	0	Afu2g08480	Afu2g08480	mrh4
Ortholog(s) have protein serine/threonine kinase activity, protein serine/threonine kinase inhibitor activity	4	4	6.8	70.925	0	11.626	12	NaN	22.9615	24.1624	NaN	0	2	2	0	Afu2g10620	Afu2g10620	Afu2g10620
Ortholog(s) have role in rRNA processing, response to drug, tRNA export from nucleus and CURI complex, UTP-C complex, small-subunit processome localization	3	3	3.4	125.81	0	20.087	12	22.8908	23.4997	23.0832	NaN	1	2	1	0	Afu3g05490	Afu3g05490	Afu3g05490
Ortholog(s) have role in cellular response to biotic stimulus, cellular response to starvation and filamentous growth of a population of unicellular organisms in response to biotic stimulus, <a href=#GOsection>more</a>	3	3	16.6	37.902	0	9.5653	9	22.3171	22.3204	NaN	NaN	1	2	0	0	Afu3g09750	Afu3g09750	Afu3g09750
Has domain(s) with predicted nucleus localization	4	4	13	47.013	0.008	2.3286	3	NaN	24.8669	NaN	NaN	0	2	0	0	Afu3g10290	Afu3g10290	Afu3g10290
Ortholog(s) have microtubule motor activity, role in actin cytoskeleton organization, conidium formation, hyphal growth, microtubule-based movement, nuclear migration and dynactin complex localization	2	2	4	71.023	0.00039139	5.9949	4	21.6866	21.7591	NaN	NaN	1	2	0	0	Afu3g10720	Afu3g10720	Afu3g10720
Ortholog of A. nidulans FGSC A4 : AN3178/sds3, A. niger CBS 513.88 : An02g09020, A. oryzae RIB40 : AO090012000818, Aspergillus wentii : Aspwe1_0170080 and Aspergillus sydowii : Aspsy1_0056129	2	2	5.5	56.046	0.00039541	6.2646	3	NaN	22.9483	22.5243	NaN	0	2	1	0	Afu3g13150	Afu3g13150	Afu3g13150
Putative thioredoxin;transcript downregulated in response to amphotericin B	4	4	35.8	11.937	0	20.705	8	25.7119	25.7262	25.7244	NaN	2	2	2	0	Afu3g14970	Afu3g14970	Afu3g14970
Ferric chelate reductase;SrbA-regulated during hypoxia	3	3	7.1	67.048	0	10.079	9	24.1418	24.0434	23.9623	NaN	1	2	1	0	Afu4g03940	Afu4g03940	fre7
Ortholog(s) have glycylpeptide N-tetradecanoyltransferase activity, role in establishment of cell polarity, replicative cell aging and cytosol localization	8	8	24.2	56.255	0	23.63	14	24.2024	23.6791	24.9902	NaN	3	2	3	0	Afu4g08070	Afu4g08070	Afu4g08070
Ortholog of A. nidulans FGSC A4 : AN1862, A. niger CBS 513.88 : An04g07280, Aspergillus wentii : Aspwe1_0166824, Aspergillus sydowii : Aspsy1_0138374 and Aspergillus terreus NIH2624 : ATET_00762	3	3	7.2	71.415	0.00039526	6.253	4	23.662	23.7419	NaN	NaN	2	2	0	0	Afu4g09790	Afu4g09790	Afu4g09790
Ortholog(s) have mitochondrial ribosome localization	3	3	17.9	24.567	0	6.6822	12	23.4984	23.4198	23.7964	NaN	3	2	2	0	Afu4g10740	Afu4g10740	Afu4g10740
Ortholog(s) have role in deadenylation-dependent decapping of nuclear-transcribed mRNA and cytosol, nucleus localization	5	5	9.6	84.889	0	13.086	4	23.32	23.1634	23.0802	NaN	2	2	1	0	Afu4g12750	Afu4g12750	Afu4g12750
Ortholog(s) have 5-3 exoribonuclease activity, magnesium ion binding activity, role in RNA phosphodiester bond hydrolysis, exonucleolytic and cytoplasmic mRNA processing body, cytoplasmic stress granule, cytosol localization	10	10	10.4	159.95	0	16.497	9	24.1154	24.3187	24.6396	NaN	2	2	2	0	Afu5g03120	Afu5g03120	Afu5g03120
Ortholog(s) have bile acid-exporting ATPase activity, role in bile acid and bile salt transport and fungal-type vacuole localization	2	2	2.1	185.21	0	9.5795	10	23.3458	23.5033	NaN	NaN	1	2	0	0	Afu5g09190	Afu5g09190	Afu5g09190
Ortholog of A. nidulans FGSC A4 : AN9206, AN1849, A. fumigatus Af293 : Afu4g01210, Afu5g02320, A. niger CBS 513.88 : An03g02680, An12g10080, An12g02060 and A. oryzae RIB40 : AO090001000129, AO090010000537	3	3	17.5	30.586	0	8.6556	10	22.9092	22.9632	23.0188	NaN	2	2	2	0	Afu5g09930	Afu5g09930	Afu5g09930
Putative Rho-type GTPase	2	2	11.5	31.675	0.00039231	6.0121	6	NaN	23.5397	NaN	NaN	0	2	0	0	Afu5g14060	Afu5g14060	rho4
Ortholog of A. nidulans FGSC A4 : AN6586, A. niger CBS 513.88 : An15g01170, Neosartorya fischeri NRRL 181 : NFIA_050850, Aspergillus wentii : Aspwe1_0036058 and Aspergillus versicolor : Aspve1_0044233	5	5	22.1	25.287	0	14.343	6	23.9199	24.0498	23.9088	NaN	1	2	1	0	Afu6g04320	Afu6g04320	Afu6g04320
Ortholog(s) have cytosol, nucleus localization	4	4	12.5	52.783	0	9.3166	9	21.1138	21.2144	21.5612	NaN	1	2	2	0	Afu6g08680	Afu6g08680	Afu6g08680
Ortholog(s) have role in DNA-templated transcription, termination, negative regulation of transcription, DNA-templated and nuclear chromatin localization	2	2	8.6	41.229	0.0034364	2.9037	6	24.1938	24.0042	24.1002	NaN	1	2	2	0	Afu6g10680	Afu6g10680	Afu6g10680
Ortholog(s) have role in wybutosine biosynthetic process and endoplasmic reticulum localization	2	2	2.2	86.297	0.0089315	2.2473	6	22.3269	22.3011	NaN	NaN	1	2	0	0	Afu6g11510	Afu6g11510	Afu6g11510
Ortholog(s) have cytosol, nucleus localization	2	2	10.5	37.007	0.0070659	2.5351	3	NaN	22.5294	NaN	NaN	0	2	0	0	Afu7g02540	Afu7g02540	Afu7g02540
Ortholog(s) have D-lactate dehydrogenase (cytochrome) activity, role in aerobic respiration, cellular carbohydrate metabolic process and mitochondrial inner membrane localization	3	3	8	66.696	0	8.7551	8	23.0933	23.864	23.082	NaN	2	2	1	0	Afu7g02560	Afu7g02560	Afu7g02560
Putative mitochondrial carrier protein	10	10	22	78.228	0	19.139	21	24.0613	24.4618	24.3037	NaN	2	2	2	0	Afu7g05220	Afu7g05220	Afu7g05220
Ortholog(s) have mitochondrion localization	3	3	18.8	23.437	0.00039573	6.2712	12	22.9342	23.0711	22.8878	NaN	1	2	3	0	Afu7g05990	Afu7g05990	Afu7g05990
