# Supplementary material for: Systems impact of zinc chelation by the epipolythiodioxopiperazine dithiol gliotoxin inAspergillus fumigatus: a new direction in natural product functionality
Source: Royal Society of Chemistry journal article supplement (doi:10.1039/c8mt00052b), 2018-01-01
Supplement: c8mt00052b2.xlsx [file c8mt00052b2.xlsx]

## Sheet: Increased DTG v Control
Table S2: Proteins with a elevated abundance in A. fumigatus aggregates when exposed to DTG in vitro compared to the control (Quantitative and Quantitative results)
Peptides	Unique peptides	Sequence coverage [%]	Mol. weight [kDa]	Q-value	Score	MS/MS Count	Mean Control	Mean DTG	Mean DTG_Zn	Valid values Control	Valid values DTG	Valid values DTG_Zn	Student's T-test p-value DTG v Control	Log2(Fold Change) DTG v Control	Student's T-test p-value DTG_Zn v Control	Log2(Fold Change) DTG_Zn v Control	Student's T-test p-value DTG_Zn v DTG	Log2(Fold Change) DTG_Zn v DTG	Protein IDs	Majority protein IDs	Gene Name	Protein Function
10	10	34	37.826	0	115.04	17	21.1348	23.7867	20.4045	3	3	2	0.000209784	2.65192	0.0100718	-0.7303	0.00107744	-3.38222	Afu6g10120	Afu6g10120	Afu6g10120	Ortholog(s) have aldehyde dehydrogenase (NAD) activity, role in response to furfural and mitochondrion, nucleus localization
22	22	38	60.501	0	323.31	59	24.0492	25.9618	23.7179	3	3	3	0.000264359	1.91258	0.141084	-0.331339	0.00018749	-2.24391	Afu3g11830	Afu3g11830	pgmA	Putative phosphoglucomutase;reacts with rabbit immunosera exposed to A. fumigatus conidia;hypoxia repressed protein;transcript up-regulated in conidia exposed to neutrophils
15	15	39.1	43.623	0	277.79	59	24.4265	25.8132	24.8516	3	3	3	0.000394804	1.38674	0.0111575	0.425126	0.00233389	-0.961613	Afu3g08380	Afu3g08380	ipp1	Putative inorganic diphosphatase;reacts with rabbit immunosera exposed to A. fumigatus conidia
7	7	24	43.154	0	46.343	14	20.7468	22.2287	20.9136	3	3	1	0.000497541	1.48194	1	0.166762	1	-1.31518	Afu4g07130	Afu4g07130	mvd1	Diphosphomevalonate decarboxylase;SrbA-regulated during hypoxia
7	6	16.8	58.832	0	245.88	16	21.0334	22.1395	20.0398	3	3	1	0.000671468	1.10614	1	-0.993565	1	-2.0997	Afu2g07810	Afu2g07810	Afu2g07810	Putative cytosolic hydroxymethyltransferase
9	9	20.6	52.654	0	177.98	25	20.9195	22.6353	21.3188	3	3	2	0.000897697	1.71577	0.410367	0.39931	0.071767	-1.31646	Afu3g09240	Afu3g09240	Afu3g09240	Has domain(s) with predicted catalytic activity and role in metabolic process
13	13	31.3	51.182	0	195.87	46	23.9752	25.2205	24.1103	3	3	3	0.000968464	1.24533	0.267989	0.135041	0.00252694	-1.11029	Afu2g09650;Afu6g02490;Afu1g04160	Afu2g09650	Afu2g09650	Aspartate transaminase;induced by L-tyrosine;transcript up-regulated in conidia exposed to neutrophils
5	5	15.3	43.467	0	38.058	11	20.8126	22.7676	20.6965	2	3	2	0.00109841	1.95503	0.562118	-0.116126	0.000445049	-2.07116	Afu3g01850	Afu3g01850	Afu3g01850	Has domain(s) with predicted protein-arginine deiminase activity and role in putrescine biosynthetic process
10	10	29.1	37.66	0	202.78	25	22.0179	23.7963	20.8506	3	3	3	0.00112138	1.77838	0.00143503	-1.16728	0.000106088	-2.94566	Afu7g00700	Afu7g00700	Afu7g00700	Ortholog(s) have oxidoreductase activity, acting on CH-OH group of donors activity and cytosol, nucleus localization
17	17	25	80.723	0	139.46	36	22.0853	23.3343	21.9892	3	3	3	0.00140318	1.24896	0.640174	-0.0961577	0.00274011	-1.34512	Afu2g14030	Afu2g14030	Afu2g14030	Ortholog(s) have arginine-tRNA ligase activity, role in arginyl-tRNA aminoacylation and cytosol, mitochondrion localization
7	7	16.9	36.858	0	129.84	21	23.0648	24.6658	22.7969	3	3	3	0.00170169	1.601	0.136559	-0.267934	0.00091396	-1.86894	Afu5g06390	Afu5g06390	Afu5g06390	Putative adenosine kinase
14	14	34.7	39.791	0	277.79	44	23.374	25.8538	21.6331	3	3	3	0.00214271	2.47984	0.00160081	-1.74085	0.000370038	-4.22069	Afu3g11690	Afu3g11690	Afu3g11690	Putative class II fructose-bisphosphate aldolase;immunoreactive protein;reacts with rabbit immunosera exposed to A. fumigatus conidia;hypoxia induced protein
45	45	56.8	86.893	0	323.31	168	25.993	27.1245	25.3551	3	3	3	0.00270219	1.13148	0.00432754	-0.637922	0.000313728	-1.7694	Afu4g07360	Afu4g07360	metH	Putative cobalamin-independent methionine synthase;protein induced by heat shock;Yap1-dependent induction in response to hydrogen peroxide;reacts with rabbit immunosera exposed to A. fumigatus conidia;no human homolog
9	9	27.8	38.599	0	69.254	16	19.8382	21.9541	NaN	2	3	0	0.00299821	2.11588	1	NaN	1	NaN	Afu1g07040	Afu1g07040	Afu1g07040	Ortholog of A. nidulans FGSC A4 : AN10646, A. niger CBS 513.88 : An07g09600, A. oryzae RIB40 : AO090012000956, Aspergillus wentii : Aspwe1_0111941 and Aspergillus terreus NIH2624 : ATET_02639
9	9	17.8	55.774	0	59.953	18	19.9713	21.3128	19.9298	3	3	1	0.00302423	1.34154	1	-0.0415427	1	-1.38308	Afu3g08660	Afu3g08660	idp1	Putative isocitrate dehydrogenase;protein induced by heat shock
10	10	30.8	28.22	0	323.31	30	22.4617	24.4045	21.4371	3	3	3	0.00314243	1.94281	0.00980803	-1.02468	0.000600414	-2.96749	Afu2g15430	Afu2g15430	Afu2g15430	Sorbitol/xylulose reductase
18	18	37.3	41.479	0	162.47	46	21.7009	24.2278	20.844	3	3	3	0.00444477	2.52685	0.145972	-0.856894	0.00409586	-3.38375	Afu1g06960	Afu1g06960	Afu1g06960	Putative pyruvate dehydrogenase complex subunit alpha;protein induced by hydrogen peroxide;hypoxia induced protein
10	10	28.2	43.478	0	102.35	29	22.3353	23.6451	21.715	3	3	3	0.00456772	1.30981	0.0170514	-0.620259	0.00151203	-1.93007	Afu1g09800	Afu1g09800	Afu1g09800	Ortholog of S. cerevisiae OLA1;snoRNA Afu-304 encoded within intron 2
16	16	21	74.789	0	178.35	39	22.5565	24.0816	22.9549	3	3	3	0.0049302	1.52512	0.264511	0.398413	0.033283	-1.12671	Afu7g05930	Afu7g05930	mepB	Putative metallopeptidase with similarity to mammalian thimet oligopeptidases;conidia-enriched protein;transcript induced by exposure to human airway epithelial cells and by growth on BSA as a sole nitrogen source
7	7	33.2	23.428	0	50.297	15	21.0748	22.689	20.3047	3	3	2	0.00541068	1.61415	0.252318	-0.77016	0.0138418	-2.38431	Afu1g14410	Afu1g14410	rpl17	60S ribosomal protein L17
16	16	27.2	71.147	0	323.31	57	24.1044	25.4049	24.9677	3	3	3	0.00555914	1.30056	0.00279245	0.86337	0.118227	-0.437187	Afu3g07810	Afu3g07810	sdh1	Succinate dehydrogenase flavoprotein subunit;role in the citric acid cycle;up-regulated in conidia exposed to neutrophils and during conidial germination;hypoxia repressed protein and transcript;induced by exposure to artemisinin
11	11	7.5	152.28	0	156.45	23	21.7402	22.8409	21.3053	3	3	3	0.00622261	1.10067	0.259822	-0.434944	0.0052017	-1.53561	Afu1g11420	Afu1g11420	Afu1g11420	Ortholog(s) have mRNA 3-UTR binding, mRNA 5-UTR binding, translation repressor activity, nucleic acid binding activity
12	12	28.1	56.715	0	96.425	23	21.9105	22.9594	21.1391	3	3	2	0.00633385	1.04889	0.0407331	-0.771421	0.00897533	-1.82031	Afu7g02180	Afu7g02180	Afu7g02180	Ortholog(s) have UDP-N-acetylglucosamine diphosphorylase activity, role in UDP-N-acetylglucosamine biosynthetic process and cytosol, nucleus localization
8	8	11.4	60.916	0	59.752	16	21.1936	23.4102	20.9619	3	3	3	0.00700041	2.21662	0.293692	-0.231681	0.00399143	-2.4483	Afu6g13540	Afu6g13540	cp3	Carboxypeptidase Y;predicted signal sequence for secretion;transcript up-regulated in conidia exposed to neutrophils;induced by growth on BSA as a sole nitrogen source
13	13	13.3	118.56	0	118.38	20	20.5403	22.2197	20.7597	3	3	2	0.00711083	1.67939	0.61045	0.219337	0.0382525	-1.46006	Afu4g07910	Afu4g07910	Afu4g07910	Putative zinc-dependent peptidase
7	7	17.9	46.648	0	51.371	10	20.5841	21.9793	20.4461	2	3	2	0.00718362	1.39524	0.634623	-0.137925	0.0101675	-1.53317	Afu1g15450	Afu1g15450	Afu1g15450	Ortholog(s) have adenylosuccinate synthase activity, sulfinylpropanyl adenylate synthase activity, role in de novo AMP biosynthetic process, cellular response to cadmium ion, fumarate metabolic process and cytosol, nucleus localizat
13	13	28.6	46.133	0	101.08	30	21.9082	23.1749	22.0339	3	3	3	0.00785525	1.26667	0.748104	0.125626	0.0169636	-1.14104	Afu2g04310	Afu2g04310	Afu2g04310	Argininosuccinate synthase;hypoxia induced protein
18	18	34.3	61.515	0	213.37	35	22.6115	24.331	22.3536	3	3	3	0.00796747	1.71943	0.406405	-0.257942	0.00301507	-1.97737	Afu1g06210	Afu1g06210	agm1	N-acetylphosphoglucosamine mutase, involved in chitin biosynthesis;essential
7	7	14	58.147	0	57.131	18	20.2139	21.9611	20.0979	3	3	3	0.00806749	1.74717	0.786126	-0.116039	0.0132985	-1.86321	Afu4g00370	Afu4g00370	Afu4g00370	General amidase;induced by growth on BSA as a sole nitrogen source
14	14	46.8	38.322	0	148.44	32	23.1035	24.5846	22.6385	3	3	3	0.00904509	1.4811	0.234174	-0.464959	0.00962047	-1.94605	Afu5g02470	Afu5g02470	nmt1	Thiamine biosynthesis protein, phoB-regulated;protein induced by H2O2;reacts with rabbit immunosera exposed to conidia;hypoxia induced protein;transcript induced by exposure to human airway epithelial cells;induced by gliotoxin
5	5	14.5	54.209	0	44.757	12	21.2559	22.928	21.0951	3	3	3	0.0106901	1.67216	0.580785	-0.160779	0.00749062	-1.83294	Afu2g05910	Afu2g05910	hxkA	Putative hexokinase;protein induced by heat shock
9	9	16.1	65.33	0	60.376	21	22.1466	23.2867	21.7142	3	3	3	0.0107013	1.14011	0.0647336	-0.432372	0.00226029	-1.57248	Afu4g00610	Afu4g00610	Afu4g00610	Putative aryl-alcohol dehydrogenase
35	35	40.8	85.528	0	323.31	119	24.9861	25.9963	25.3476	3	3	3	0.0118381	1.01013	0.116048	0.361449	0.0535034	-0.648677	Afu6g12930	Afu6g12930	acoA	Mitochondrial aconitate hydratase;citric acid cycle enzyme;protein abundant in conidia;transcript induced in conidia exposed to neutrophils;reacts with rabbit immunosera exposed to A. fumigatus conidia;hypoxia induced
15	15	32.5	50.352	0	161.46	50	22.7579	24.2561	22.5777	3	3	3	0.0120434	1.49821	0.484185	-0.180148	0.0138955	-1.67836	Afu5g08930	Afu5g08930	Afu5g08930	Putative isovaleryl-CoA dehydrogenase;ortholog of A. nidulans ivdA;transcript induced by exposure to human airway epithelial cells
9	9	22.7	40.044	0	131.04	23	22.7643	23.8618	24.2789	3	3	3	0.0127143	1.09752	0.000168125	1.51464	0.177381	0.417127	Afu2g01040	Afu2g01040	Afu2g01040	Putative formaldehyde dehydrogenase;transcript up-regulated in conidia exposed to neutrophils
14	14	42.2	25.586	0	323.31	51	23.5501	24.6883	22.8535	3	3	3	0.0129866	1.13819	0.0356953	-0.696639	0.00151046	-1.83482	Afu2g09210	Afu2g09210	Afu2g09210	60S ribosomal protein L10;reacts with rabbit immunosera exposed to A. fumigatus conidia
10	10	24.9	50.255	0	216.67	31	22.5686	24.8866	21.9165	3	3	3	0.013206	2.31802	0.184372	-0.652034	0.00156939	-2.97006	Afu2g04220	Afu2g04220	hmgA	Homogentisate 1,2-dioxygenase involved in L-tyrosine degradation;induced by L-tyrosine;mutants produce less pyomelanin when grown on tyrosine as the sole carbon source;transcript induced by exposure to human airway epithelial cells
10	10	19.9	63.168	0	123.1	45	22.5822	23.7295	24.127	3	3	3	0.0132953	1.14733	0.0034733	1.54482	0.268327	0.39749	Afu2g15490	Afu2g15490	Afu2g15490	Ortholog(s) have intracellular localization
12	12	42	31.374	0	131.33	29	21.9233	24.0199	21.1442	3	3	3	0.0140051	2.09657	0.125764	-0.779096	0.00157431	-2.87566	Afu5g08290	Afu5g08290	Afu5g08290	Ortholog(s) have intracellular localization
3	3	7.8	46.227	0	39.162	11	19.8201	21.2905	NaN	2	3	0	0.014424	1.47034	1	NaN	1	NaN	Afu3g07680	Afu3g07680	Afu3g07680	Putative ran GTPase activating protein
5	5	12.4	56.541	0	42.839	10	19.8982	21.4884	NaN	3	3	0	0.0155013	1.59017	1	NaN	1	NaN	Afu3g03020	Afu3g03020	Afu3g03020	Putative phosphoglucomutase
6	6	43.8	16.054	0	135.7	27	22.4214	24.103	21.912	3	3	2	0.0162978	1.68164	0.3061	-0.509388	0.0161056	-2.19102	Afu8g00400	Afu8g00400	Afu8g00400	Protein of unknown function;encoded in the fma (fumagillin) secondary metabolite gene cluster
12	12	24.2	66.657	0	93.831	19	20.8751	22.763	20.8543	2	3	2	0.0178037	1.88788	0.947682	-0.0207882	0.0230192	-1.90866	Afu4g12920	Afu4g12920	Afu4g12920	Putative mitochondrial histidyl-tRNA synthetase;protein induced by heat shock
9	9	20	51.671	0	105.3	17	20.8983	22.4421	20.7794	3	3	3	0.0194373	1.54387	0.783109	-0.118895	0.0260658	-1.66277	Afu1g10780	Afu1g10780	Afu1g10780	Glycine cleavage system T protein;SrbA-regulated during hypoxia
11	11	26.4	54.453	0	98.852	21	21.4873	22.8903	21.9103	3	3	2	0.0207566	1.40298	0.210383	0.42295	0.150093	-0.980029	Afu6g02230	Afu6g02230	glkA	Putative glucokinase;conidia-enriched protein;transcripts extremely abundant in resting conidia, levels decline during germination;transcript induced by exposure to human airway epithelial cells
20	20	48	46.997	0	323.31	50	23.8114	25.1029	23.0378	3	3	3	0.0240009	1.29147	0.00582558	-0.773591	0.00575491	-2.06506	Afu4g10410	Afu4g10410	Afu4g10410	Putative aspartate aminotransferase;reacts with rabbit immunosera exposed to A. fumigatus conidia;hypoxia induced protein;transcript induced in conidia exposed to neutrophils or to human airway epithelial cells
3	3	5.3	59.479	0	24.78	8	20.5077	21.7425	20.377	2	3	2	0.0244417	1.23483	0.460904	-0.130674	0.0220919	-1.3655	Afu3g12690	Afu3g12690	glfA	Putative UDP-galactopyranose mutase, enzyme in the first step of galactofuranose biosynthesis;mutant unmasks mannan residues on the cell surface, which is thought to contribute to increased cell adhesion
5	5	14	45.088	0	49.345	11	20.7321	22.5458	20.8568	3	3	3	0.0269069	1.81366	0.749792	0.124723	0.0141881	-1.68893	Afu6g05120	Afu6g05120	Afu6g05120	Ortholog(s) have protein serine/threonine kinase activity, protein serine/threonine/tyrosine kinase activity, protein tyrosine kinase activity
7	7	21.5	46.273	0	70.972	14	20.2477	22.2622	20.1974	3	3	1	0.0290783	2.0145	1	-0.0503527	1	-2.06485	Afu3g12560	Afu3g12560	Afu3g12560	Putative allantoicase;induced by gliotoxin exposure
3	3	9.1	37.343	0	37.726	7	19.451	20.9934	18.9777	2	3	1	0.0296481	1.54238	1	-0.473381	1	-2.01576	Afu5g07170	Afu5g07170	Afu5g07170	Ortholog of A. nidulans FGSC A4 : AN2225, A. niger CBS 513.88 : An17g00550, A. oryzae RIB40 : AO090701000254, Aspergillus wentii : Aspwe1_0048029 and Aspergillus sydowii : Aspsy1_0039724
18	18	42.7	62.104	0	323.31	41	23.4069	24.602	23.0351	3	3	3	0.0312406	1.19507	0.236176	-0.37182	0.0131342	-1.56689	Afu6g03730	Afu6g03730	Afu6g03730	2-methylcitrate dehydratase;hypoxia repressed protein;transcript up-regulated in conidia exposed to neutrophils and to human airway epithelial cells;no human homolog
13	13	26.4	51.132	0	90.879	21	21.0799	23.1593	19.9741	3	3	3	0.0360168	2.07935	0.0188088	-1.10584	0.00681189	-3.18519	Afu4g08760	Afu4g08760	Afu4g08760	Ortholog(s) have 3-deoxy-7-phosphoheptulonate synthase activity
9	9	21.8	60.185	0	214.19	25	22.0132	23.4503	20.9827	3	3	2	0.0364146	1.43711	0.0697527	-1.0305	0.0197879	-2.46761	Afu8g04090;Afu1g00460	Afu8g04090;Afu1g00460	codA	Putative choline oxidase;AFUB_083470 choA ortholog;Afu1g00460 Afu1g00460 Ortholog(s) have intracellular localization
19	19	50.6	39.899	0	323.31	102	26.3726	27.808	26.8169	3	3	3	0.0401559	1.43545	0.182679	0.444338	0.085734	-0.991109	Afu4g13120	Afu4g13120	Afu4g13120	Putative glutamine synthetase;protein induced by heat shock and by hydrogen peroxide;transcript induced by exposure to human airway epithelial cells
9	9	27.1	39.784	0	126.13	12	20.5409	21.9188	20.3982	3	3	1	0.0434721	1.37789	1	-0.142667	1	-1.52056	Afu1g04820	Afu1g04820	Afu1g04820	D-xylose reductase
5	5	9.6	67.112	0	48.678	14	21.8811	22.933	21.4316	3	3	3	0.0464391	1.05196	0.0814432	-0.449448	0.0119437	-1.5014	Afu4g11720	Afu4g11720	Afu4g11720	Putative phosphatidyl synthase;protein levels increase in response to pkaC overexpression
7	7	12.5	58.936	0	57.102	11	21.2797	22.3234	NaN	3	3	0	0.047367	1.04365	1	NaN	1	NaN	Afu3g08470	Afu3g08470	Afu3g08470	Glucose-6-phosphate 1-dehydrogenase
4	4	9.6	50.627	0	24.375	6	NaN	20.2089	20.8844	0	3	2	1	NaN	1	NaN	0.0211984	0.675483	Afu4g05940	Afu4g05940	Afu4g05940	Ortholog(s) have cytosol, nucleus localization
3	3	5.7	49.835	0	26.479	3	NaN	20.5055	19.9252	0	3	1	1	NaN	1	NaN	1	-0.58025	Afu8g05850	Afu8g05850	Afu8g05850	Has domain(s) with predicted oxidoreductase activity and role in oxidation-reduction process
4	4	10	62.115	0	22.683	4	NaN	18.9672	18.8506	0	3	1	1	NaN	1	NaN	1	-0.116599	Afu4g12600	Afu4g12600	Afu4g12600	Phosphoribosylaminoimidazole carboxylase;role in purine base metabolism;no human homolog
2	2	3.5	77.03	0	17.555	3	NaN	18.9041	19.2142	0	3	2	1	NaN	1	NaN	0.0679667	0.310109	Afu3g12800	Afu3g12800	Afu3g12800	Ortholog(s) have cell division site, cytosol, nucleus localization
3	3	13.2	35.125	0	18.221	5	NaN	19.9312	20.7555	0	2	3	1	NaN	1	NaN	0.0361682	0.824302	Afu1g02070	Afu1g02070	Afu1g02070	Cytochrome C1
2	2	3.3	87.253	0	14.982	2	NaN	18.9158	18.6052	0	2	1	1	NaN	1	NaN	1	-0.310558	Afu2g06330	Afu2g06330	Afu2g06330	Putative ubiquitin C-terminal hydrolase;conidia-enriched protein
2	2	2.8	77.156	0	14.634	3	NaN	18.5078	18.2036	0	2	1	1	NaN	1	NaN	1	-0.304282	Afu2g05450	Afu2g05450	Afu2g05450	Mitochondrial NADH dehydrogenase involved in oxidative phosphorylation;repressed by exposure to artemisinin
2	2	3.4	56.038	0	11.997	2	NaN	19.2863	19.1406	0	2	1	1	NaN	1	NaN	1	-0.145672	Afu3g12150	Afu3g12150	Afu3g12150	Has domain(s) with predicted oxidoreductase activity and role in oxidation-reduction process
4	4	8.4	64.991	0	32.3	9	NaN	21.2206	NaN	0	3	0	1	NaN	1	0	1	NaN	Afu1g03550	Afu1g03550	ilv3B	Putative mitochondrial dihydroxy acid dehydratase;SrbA-regulated during hypoxia
3	3	10	39.459	0	22.035	9	NaN	21.2142	NaN	0	3	0	1	NaN	1	0	1	NaN	Afu1g13370	Afu1g13370	Afu1g13370	Putative aldo-keto reductase;transcript up-regulated in conidia exposed to neutrophils
3	3	13.4	30.397	0	19.618	4	NaN	19.6805	NaN	0	3	0	1	NaN	1	0	1	NaN	Afu2g02490	Afu2g02490	Afu2g02490	Ortholog of A. nidulans FGSC A4 : AN0401, Aspergillus flavus NRRL 3357 : AFL2T_08730, Aspergillus versicolor : Aspve1_0035846 and Aspergillus fumigatus A1163 : AFUB_019590
3	3	9.3	54.725	0	62.351	7	NaN	21.7938	NaN	0	3	0	1	NaN	1	0	1	NaN	Afu2g11940	Afu2g11940	ade13	Adenylosuccinate lyase;reacts with rabbit immunosera exposed to A. fumigatus conidia
2	2	7	32.365	0	13.025	3	NaN	19.9853	NaN	0	3	0	1	NaN	1	0	1	NaN	Afu2g13470	Afu2g13470	Afu2g13470	Ortholog(s) have nucleotidase activity, role in pyrimidine nucleobase metabolic process and cytosol, nucleus localization
3	3	6.8	58.073	0	17.97	4	NaN	20.3248	NaN	0	3	0	1	NaN	1	0	1	NaN	Afu2g13630	Afu2g13630	aro8	Putative amino transferase;immunoreactive protein;transcript induced by exposure to human airway epithelial cells and by growth on BSA as a sole nitrogen source
2	2	4.5	60.059	0	14.763	3	NaN	18.6687	NaN	0	3	0	1	NaN	1	0	1	NaN	Afu4g08600	Afu4g08600	Afu4g08600	Putative aldehyde dehydrogenase (NAD(P)+)
2	2	3.7	68.281	0	19.223	4	NaN	20.2846	NaN	0	3	0	1	NaN	1	0	1	NaN	Afu4g09010	Afu4g09010	Afu4g09010	Ortholog(s) have U1 snRNP localization
2	2	3.9	56.569	0	17.345	6	NaN	20.3883	NaN	0	3	0	1	NaN	1	0	1	NaN	Afu4g10330	Afu4g10330	Afu4g10330	Ortholog(s) have protein farnesyltransferase activity, role in protein farnesylation and cytosol, nucleus, protein farnesyltransferase complex localization
2	2	4.4	60.382	0	12.35	3	NaN	19.5024	NaN	0	3	0	1	NaN	1	0	1	NaN	Afu5g02230	Afu5g02230	Afu5g02230	Putative actin interacting protein;protein induced by hydrogen peroxide
5	5	19.4	41.977	0	63.467	6	NaN	21.771	NaN	0	3	0	1	NaN	1	0	1	NaN	Afu6g12480	Afu6g12480	nif3	NGG1 interacting factor
4	4	10.7	53.848	0	23.213	4	NaN	20.0649	NaN	0	2	0	1	NaN	1	0	1	NaN	Afu1g07200	Afu1g07200	Afu1g07200	Has domain(s) with predicted catalytic activity, heme binding, oxidoreductase activity
2	2	5.3	55.222	0	12.692	2	NaN	18.9401	NaN	0	2	0	1	NaN	1	0	1	NaN	Afu1g14920	Afu1g14920	Afu1g14920	Putative peptidase D;induced by growth on BSA as a sole nitrogen source
2	2	2.9	38.185	0.001506	11.23	2	NaN	19.5306	NaN	0	2	0	1	NaN	1	0	1	NaN	Afu1g17040	Afu1g17040	Afu1g17040	Ortholog(s) have cytosol, nucleus localization
2	2	4.5	49.387	0	13.284	2	NaN	19.5117	NaN	0	2	0	1	NaN	1	0	1	NaN	Afu2g01220	Afu2g01220	Afu2g01220	Putative GTP cyclohydrolase II;transcript up-regulated in conidia exposed to neutrophils
4	4	17.3	25.311	0	26.412	5	NaN	20.2328	NaN	0	2	0	1	NaN	1	0	1	NaN	Afu2g04240	Afu2g04240	maiA	maleylacetoacetate isomerase involved in L-tyrosine degradation
2	2	4.2	72.832	0	19.306	2	NaN	19.3157	NaN	0	2	0	1	NaN	1	0	1	NaN	Afu2g08280	Afu2g08280	maeA	Putative NADP-dependent malic enzyme
2	2	4.3	52.855	0.0015699	11.87	2	NaN	17.619	NaN	0	2	0	1	NaN	1	0	1	NaN	Afu2g13710	Afu2g13710	Afu2g13710	NADH-ubiquinone oxidoreductase 49 kDa subunit
3	3	8.4	46.25	0	20.279	3	NaN	18.8955	NaN	0	2	0	1	NaN	1	0	1	NaN	Afu4g00630	Afu4g00630	Afu4g00630	Has domain(s) with predicted catalytic activity, pyridoxal phosphate binding activity and role in biosynthetic process
2	2	1.3	161.49	0.0015267	11.489	3	NaN	18.7448	NaN	0	2	0	1	NaN	1	0	1	NaN	Afu4g04350	Afu4g04350	Afu4g04350	Ortholog(s) have U2-type spliceosomal complex localization
2	2	3.5	71.446	0	12.334	2	NaN	18.6844	NaN	0	2	0	1	NaN	1	0	1	NaN	Afu4g04680	Afu4g04680	Afu4g04680	FGGY-family carbohydrate kinase;protein induced by heat shock
2	2	5.9	36.326	0.0015823	11.897	4	NaN	20.4318	NaN	0	2	0	1	NaN	1	0	1	NaN	Afu5g02850	Afu5g02850	Afu5g02850	Has domain(s) with predicted arylformamidase activity and role in tryptophan catabolic process to kynurenine
2	2	6.8	61.109	0.0015291	11.496	2	NaN	19.3527	NaN	0	2	0	1	NaN	1	0	1	NaN	Afu5g02930	Afu5g02930	Afu5g02930	Has domain(s) with predicted role in cellular amino acid metabolic process
2	2	3.9	57.274	0	12.404	3	NaN	18.5883	NaN	0	2	0	1	NaN	1	0	1	NaN	Afu5g03330	Afu5g03330	Afu5g03330	Ortholog of A. nidulans FGSC A4 : AN7517, A. niger CBS 513.88 : An09g05650, A. oryzae RIB40 : AO090102000538, Aspergillus wentii : Aspwe1_0043027 and Aspergillus sydowii : Aspsy1_0146077
3	3	4.8	77.01	0	19.387	3	NaN	20.9559	NaN	0	2	0	1	NaN	1	0	1	NaN	Afu5g03480	Afu5g03480	Afu5g03480	Ortholog(s) have methylenetetrahydrofolate reductase (NAD(P)H) activity and role in methionine biosynthetic process, one-carbon metabolic process
2	2	6.3	37.18	0	12.351	2	NaN	18.2216	NaN	0	2	0	1	NaN	1	0	1	NaN	Afu5g06240	Afu5g06240	alcC	Putative zinc-dependent alcohol dehydrogenase, involved in ethanol fermentation;predicted gene pair with adh1;protein induced by hydrogen peroxide;reacts with rabbit immunosera exposed to A. fumigatus conidia
2	2	0.9	243.61	0	12.261	2	NaN	17.027	NaN	0	2	0	1	NaN	1	0	1	NaN	Afu6g08420	Afu6g08420	Afu6g08420	Ortholog(s) have ubiquitin protein ligase activity
2	2	3.6	56.016	0.0015083	11.294	2	NaN	18.5435	NaN	0	2	0	1	NaN	1	0	1	NaN	Afu6g09190	Afu6g09190	Afu6g09190	M24 family metallopeptidase
2	2	7	48.529	0	13.27	3	NaN	19.4448	NaN	0	2	0	1	NaN	1	0	1	NaN	Afu8g00250	Afu8g00250	ftmPT2	Asp Putative prenyltransferase involved in fumitremorgin B biosynthesis

## Sheet: Decreased DTG_Zn v Control
Table S2: Proteins with lower abundance in A. fumigatus aggregates when exposed to DTG/Zn2+ in vitro compared to the control (Quantitative and Qualitative results)
Peptides	Unique peptides	Sequence coverage [%]	Mol. weight [kDa]	Q-value	Score	MS/MS Count	Mean Control	Mean DTG	Mean DTG_Zn	Valid values Control	Valid values DTG	Valid values DTG_Zn	Student's T-test p-value DTG v Control	Log2(Fold Change) DTG v Control	Student's T-test p-value DTG_Zn v Control	Log2(Fold Change) DTG_Zn v Control	Student's T-test p-value DTG_Zn v DTG	-Log2(Fold Change) DTG_Zn v DTG	Protein IDs	Majority protein IDs	Gene Name	Protein Function
11	11	26.9	55.206	0	137.08	33	22.6801	22.8682	20.9	3	3	3	0.58386	0.188127	0.00227138	-1.78011	0.00298216	-1.96823	Afu5g06680	Afu5g06680	gatA	4-aminobutyrate aminotransferase;transcript downregulated in response to voriconazole;calcium induced
14	14	34.7	39.791	0	277.79	44	23.374	25.8538	21.6331	3	3	3	0.00214271	2.47984	0.00160081	-1.74085	0.000370038	-4.22069	Afu3g11690	Afu3g11690	Afu3g11690	Putative class II fructose-bisphosphate aldolase;immunoreactive protein;reacts with rabbit immunosera exposed to A. fumigatus conidia;hypoxia induced protein
18	18	53.7	47.305	0	314.55	69	25.5698	25.2064	24.2111	3	3	3	0.450937	-0.363385	0.00283277	-1.35868	0.100636	-0.995298	Afu6g06770	Afu6g06770	aspf22	Asp Putative enolase;allergen Asp f 22;conidia-enriched protein;transcript induced by growth on hydrogen peroxide;hypoxia induced protein;transcript induced by exposure to human airway epithelial cells
5	5	17.8	32.122	0	157.88	31	23.692	24.0823	22.3556	3	3	3	0.101455	0.390268	0.0269375	-1.33636	0.00864	-1.72662	Afu3g13320	Afu3g13320	rps0	Putative 40S ribosomal protein S0
20	20	57.7	35.448	0	293.84	54	24.5535	25.4777	23.2759	3	3	3	0.0248319	0.924264	0.00466428	-1.27755	0.000281552	-2.20181	Afu5g09230	Afu5g09230	Afu5g09230	Putative transaldolase;abundant protein in conidia and mycelia;protein induced by hydrogen peroxide and hypoxia
10	10	26.6	45.778	0	125.52	21	22.8546	22.1234	21.5788	3	3	3	0.328662	-0.731195	0.0455698	-1.27577	0.409739	-0.544572	Afu3g08160	Afu3g08160	tif1	Eukaryotic translation initiation factor eIF4A;ATP-dependent RNA helicase;protein induced by heat shock;predicted gene pair with AFUA_5G02410
4	4	10.2	47.602	0	32.239	25	24.3223	22.2077	23.1113	3	3	3	0.00226481	-2.1146	0.00801197	-1.211	0.0767146	0.903605	Afu3g03320	Afu3g03320	Afu3g03320	Has domain(s) with predicted role in transmembrane transport and integral component of membrane localization
11	11	30.1	29.2	0	131.94	25	22.8328	23.1156	21.6639	3	3	3	0.0757443	0.282825	0.00281469	-1.16889	0.00126344	-1.45172	Afu5g05450	Afu5g05450	rps1	40S ribosomal protein S3Ae;40S ribosomal protein S1;reacts with rabbit immunosera exposed to A. fumigatus conidia
10	10	29.1	37.66	0	202.78	25	22.0179	23.7963	20.8506	3	3	3	0.00112138	1.77838	0.00143503	-1.16728	0.000106088	-2.94566	Afu7g00700	Afu7g00700	Afu7g00700	Ortholog(s) have oxidoreductase activity, acting on CH-OH group of donors activity and cytosol, nucleus localization
7	7	22.8	28.305	0	74.839	27	23.86	23.7194	22.7007	3	3	3	0.711684	-0.140597	0.0351575	-1.15931	0.0803783	-1.01871	Afu7g01460	Afu7g01460	Afu7g01460	Ribosomal protein S5
13	13	26.4	51.132	0	90.879	21	21.0799	23.1593	19.9741	3	3	3	0.0360168	2.07935	0.0188088	-1.10584	0.00681189	-3.18519	Afu4g08760	Afu4g08760	Afu4g08760	Ortholog(s) have 3-deoxy-7-phosphoheptulonate synthase activity
9	9	37.4	40.561	0	148.7	28	24.299	25.3579	23.2156	3	3	3	0.0545679	1.05887	0.0201442	-1.08341	0.00469936	-2.14227	Afu3g04170	Afu3g04170	Afu3g04170	Ortholog(s) have pyruvate dehydrogenase (acetyl-transferring) activity and role in acetyl-CoA biosynthetic process from pyruvate, arginine biosynthetic process, glutamine biosynthetic process
16	15	58.1	36.14	0	164.55	61	27.4161	26.6308	26.3754	3	3	3	0.124268	-0.785261	0.0494944	-1.04068	0.440562	-0.25542	Afu5g01030	Afu5g01030	Afu5g01030	Putative glyceraldehyde 3-phosphate dehydrogenase;predicted gene pair with AFUA_5G01970 (gpdA);hypoxia induced protein
22	22	38.5	59.932	0	261.52	65	25.2129	24.2374	24.175	3	3	3	0.0253314	-0.975468	0.00733178	-1.03794	0.824199	-0.0624708	Afu8g05320	Afu8g05320	Afu8g05320	Putative mitochondrial F1 ATPase subunit alpha;hypoxia induced protein
10	10	30.8	28.22	0	323.31	30	22.4617	24.4045	21.4371	3	3	3	0.00314243	1.94281	0.00980803	-1.02468	0.000600414	-2.96749	Afu2g15430	Afu2g15430	Afu2g15430	Sorbitol/xylulose reductase
5	5	12.4	56.541	0	42.839	10	19.8982	21.4884	NaN	3	3	0	0.0155013	1.59017	1	NaN	1	NaN	Afu3g03020	Afu3g03020	Afu3g03020	Putative phosphoglucomutase
7	7	12.5	58.936	0	57.102	11	21.2797	22.3234	NaN	3	3	0	0.047367	1.04365	1	NaN	1	NaN	Afu3g08470	Afu3g08470	Afu3g08470	Glucose-6-phosphate 1-dehydrogenase
6	6	18.4	38.093	0	40.749	11	20.1775	21.0673	NaN	3	3	0	0.000615712	0.889797	1	NaN	1	NaN	Afu6g07390	Afu6g07390	lysB	Putative homoisocitrate dehydrogenase with a role in lysine metabolism;hypoxia induced protein
4	4	14.1	33.845	0	39.66	8	20.5225	21.3736	NaN	3	3	0	0.0038741	0.851094	1	NaN	1	NaN	Afu5g02240	Afu5g02240	Afu5g02240	NAD dependent epimerase/dehydratase family protein
7	7	11.6	73.154	0	72.621	14	20.4735	21.2252	NaN	3	3	0	0.0107349	0.751766	1	NaN	1	NaN	Afu2g12530	Afu2g12530	Afu2g12530	Putative carnitine acetyl transferase with a predicted role in acetate metabolism;transcript up-regulated in conidia exposed to neutrophils
2	2	12.6	18.627	0	11.981	4	21.3164	20.612	NaN	3	3	0	0.0430008	-0.704414	1	NaN	1	NaN	Afu1g12070	Afu1g12070	Afu1g12070	Ortholog(s) have glycine dehydrogenase (decarboxylating) activity, role in glycine catabolic process, one-carbon metabolic process, protein lipoylation and mitochondrion localization
8	8	23.5	43.003	0	66.023	10	20.4978	21.813	NaN	3	3	0	0.050003	1.31523	1	NaN	1	NaN	Afu2g10660	Afu2g10660	mpdA	Putative mannitol-1-phosphate dehydrogenase;conidia-enriched protein;protein induced by heat shock;reacts with rabbit immunosera exposed to conidia;no human homolog
4	4	11.1	42.117	0	26.888	10	20.0939	20.9953	NaN	3	3	0	0.0844683	0.9014	1	NaN	1	NaN	Afu3g01450	Afu3g01450	Afu3g01450	Putative 3-methyl-2-oxobutanoate dehydrogenase;transcript induced by voriconazole
4	4	18.4	24.252	0	138.87	12	21.9993	22.5391	NaN	3	3	0	0.179881	0.539796	1	NaN	1	NaN	Afu1g11710	Afu1g11710	Afu1g11710	Ribosomal protein L1
3	3	8.8	46.82	0	20.217	3	20.2661	20.119	NaN	3	3	0	0.543659	-0.147072	1	NaN	1	NaN	Afu5g05540	Afu5g05540	nap1	Putative nucleosome assembly protein
6	6	6.6	108.68	0	39.324	13	20.3857	20.1029	NaN	3	3	0	0.0925021	-0.282787	1	NaN	1	NaN	Afu5g09250	Afu5g09250	Afu5g09250	Ortholog(s) have cytosol localization
2	2	18.1	16.761	0	20.324	4	20.177	19.5408	NaN	3	3	0	0.0814126	-0.636255	1	NaN	1	NaN	Afu3g05600	Afu3g05600	Afu3g05600	60S ribosomal protein L27a
2	2	4.6	44.152	0	14.075	3	18.4289	18.9507	NaN	3	2	0	0.512792	0.521832	1	NaN	1	NaN	Afu1g10810	Afu1g10810	Afu1g10810	Ortholog(s) have role in calcium ion transport into cytosol and cytosol, plasma membrane localization
3	3	4.5	96.106	0	27.429	9	20.3459	20.5605	NaN	3	2	0	0.80803	0.214554	1	NaN	1	NaN	Afu4g06690	Afu4g06690	Afu4g06690	Ortholog(s) have CDP reductase activity, nucleoside diphosphate kinase activity, nucleotide binding activity
2	2	1.2	163.98	0	13.277	5	20.0884	19.2564	NaN	3	2	0	0.0553325	-0.832	1	NaN	1	NaN	Afu2g09490	Afu2g09490	Afu2g09490	Eukaryotic translation initiation factor subunit eIF-4F
2	2	4.8	56.388	0	12.94	4	20.615	19.3897	NaN	3	2	0	0.173534	-1.22536	1	NaN	1	NaN	Afu1g03150	Afu1g03150	erg24	Putative c-14 sterol reductase with a predicted role in ergosterol biosynthesis;induced by exposure to artemisinin;SrbA-regulated during hypoxia
5	5	2.8	242.34	0	30.539	5	20.9575	19.3321	NaN	3	1	0	1	-1.62541	1	NaN	1	NaN	Afu2g01760	Afu2g01760	Afu2g01760	Ortholog of A. nidulans FGSC A4 : AN0391, AN7222, A. fumigatus Af293 : Afu1g01490, A. niger CBS 513.88 : An03g06670, An15g07300 and A. oryzae RIB40 : AO090010000045/aoiD, AO090102000259
3	3	18.8	21.45	0	17.545	4	20.1869	18.4867	NaN	3	1	0	1	-1.70019	1	NaN	1	NaN	Afu1g06340	Afu1g06340	Afu1g06340	Putative 60S ribosomal protein L27
2	2	2.4	100.36	0.0015552	11.793	3	20.099	NaN	NaN	3	0	0	1	NaN	1	NaN	1	0	Afu5g10920	Afu5g10920	Afu5g10920	Ortholog(s) have Golgi apparatus localization
9	9	27.8	38.599	0	69.254	16	19.8382	21.9541	NaN	2	3	0	0.00299821	2.11588	1	NaN	1	NaN	Afu1g07040	Afu1g07040	Afu1g07040	Ortholog of A. nidulans FGSC A4 : AN10646, A. niger CBS 513.88 : An07g09600, A. oryzae RIB40 : AO090012000956, Aspergillus wentii : Aspwe1_0111941 and Aspergillus terreus NIH2624 : ATET_02639
3	3	7.8	46.227	0	39.162	11	19.8201	21.2905	NaN	2	3	0	0.014424	1.47034	1	NaN	1	NaN	Afu3g07680	Afu3g07680	Afu3g07680	Putative ran GTPase activating protein
5	5	13.4	44.007	0	46.137	5	19.4988	20.4321	NaN	2	3	0	0.0853228	0.93327	1	NaN	1	NaN	Afu2g10420	Afu2g10420	Afu2g10420	Has domain(s) with predicted catalytic activity and role in metabolic process
4	4	11.4	35.803	0	45.701	11	21.0989	21.9272	NaN	2	3	0	0.0727648	0.828332	1	NaN	1	NaN	Afu5g12780	Afu5g12780	Afu5g12780	Ortholog of A. nidulans FGSC A4 : AN8430, A. niger CBS 513.88 : An18g00330, A. oryzae RIB40 : AO090010000134, Neosartorya fischeri NRRL 181 : NFIA_074390 and Aspergillus wentii : Aspwe1_0449405
4	4	13.5	46.596	0	62.025	7	19.5019	20.238	NaN	2	3	0	0.149657	0.736033	1	NaN	1	NaN	Afu3g04150	Afu3g04150	Afu3g04150	Ortholog(s) have enoyl-[acyl-carrier-protein] reductase activity, role in aerobic respiration, fatty acid biosynthetic process and mitochondrion localization
2	2	9.9	21.437	0	15.031	2	19.3168	19.9534	NaN	2	3	0	0.277321	0.636572	1	NaN	1	NaN	Afu2g03040	Afu2g03040	Afu2g03040	Ribosomal protein L34
2	2	3.6	51.874	0	12.799	4	19.4919	19.9515	NaN	2	3	0	0.352758	0.459614	1	NaN	1	NaN	Afu3g06550	Afu3g06550	Afu3g06550	Has domain(s) with predicted phosphatase activity, phosphoserine phosphatase activity and role in L-serine biosynthetic process, metabolic process
2	2	7.2	40.915	0	23.65	3	19.2139	19.6277	NaN	2	3	0	0.20742	0.413791	1	NaN	1	NaN	Afu1g02110	Afu1g02110	Afu1g02110	3-deoxy-7-phosphoheptulonate synthase;no human homolog
3	3	6.6	52.69	0	24.331	6	19.4827	19.8964	NaN	2	3	0	0.393566	0.413641	1	NaN	1	NaN	Afu4g11190	Afu4g11190	Afu4g11190	Ortholog(s) have cytosol, nucleus localization
4	4	4	114.62	0	26.287	6	20.0511	20.3876	NaN	2	3	0	0.523197	0.336553	1	NaN	1	NaN	Afu6g08920	Afu6g08920	Afu6g08920	Assimilatory sulfite reductase
3	3	7.9	58.603	0	18.975	8	19.6286	19.8832	NaN	2	3	0	0.807458	0.254591	1	NaN	1	NaN	Afu2g13030	Afu2g13030	Afu2g13030	Ortholog(s) have phenylalanine-tRNA ligase activity, role in mitochondrial phenylalanyl-tRNA aminoacylation and mitochondrion localization
3	3	8.3	49.215	0	23	7	19.3038	19.5558	NaN	2	3	0	0.279852	0.251953	1	NaN	1	NaN	Afu5g06500	Afu5g06500	Afu5g06500	Acyl-CoA dehydrogenase family protein with a predicted role in fatty acid beta oxidation;induced by exposure to artemisinin
4	4	15.3	38.192	0	29.273	4	19.333	19.5793	NaN	2	3	0	0.676844	0.246267	1	NaN	1	NaN	Afu2g17430	Afu2g17430	Afu2g17430	Ortholog(s) have nitronate monooxygenase activity and role in denitrification pathway, detoxification of nitrogen compound
4	4	11.4	53.562	0	25.865	4	19.0218	19.2342	NaN	2	3	0	0.573398	0.212385	1	NaN	1	NaN	Afu6g10470	Afu6g10470	zpr1	Putative zinc finger protein;transcript highly induced during conidial germination
4	4	8.4	61.612	0	25.548	4	19.481	19.5996	NaN	2	3	0	0.620796	0.118598	1	NaN	1	NaN	Afu6g10600	Afu6g10600	Afu6g10600	Ortholog(s) have cytosol, nucleus localization
5	5	9.4	77.377	0	34.86	5	20.4041	20.0816	NaN	2	3	0	0.373748	-0.322519	1	NaN	1	NaN	Afu2g13250	Afu2g13250	trpB	Putative bifunctional tryptophan synthase
3	3	13.6	28.323	0	17.814	3	19.4654	20.1371	NaN	2	2	0	0.0165125	0.671733	1	NaN	1	NaN	Afu1g04900	Afu1g04900	Afu1g04900	Proliferating cell nuclear antigen (PCNA);conidia-enriched protein
4	4	8.9	56.998	0	29.047	5	18.8849	20.2793	NaN	2	2	0	0.166616	1.39447	1	NaN	1	NaN	Afu1g16480	Afu1g16480	Afu1g16480	Ortholog(s) have mitochondrion localization
3	3	4.8	90.864	0	20.66	4	19.6909	20.3396	NaN	2	2	0	0.0989655	0.648668	1	NaN	1	NaN	Afu5g09610	Afu5g09610	Afu5g09610	Ortholog(s) have role in spore germination and cytosol localization
5	5	14.7	45.973	0	61.521	8	20.2187	20.6092	NaN	2	2	0	0.0605977	0.390522	1	NaN	1	NaN	Afu4g06160	Afu4g06160	Afu4g06160	Branched-chain-amino-acid transaminase;SrbA-regulated during hypoxia
3	3	5.6	50.816	0	19.485	3	19.1213	19.4938	NaN	2	2	0	0.304248	0.372462	1	NaN	1	NaN	Afu2g01750	Afu2g01750	Afu2g01750	Has domain(s) with predicted aminopeptidase activity, metalloexopeptidase activity and role in cellular process, proteolysis
3	3	3.7	117.77	0	22.262	5	19.8564	19.7032	NaN	2	2	0	0.709932	-0.153186	1	NaN	1	NaN	Afu7g05660	Afu7g05660	Afu7g05660	Putative translation elongation factor eEF-3;protein induced by heat shock and hypoxia
3	3	7.4	49.101	0	20.961	2	19.7598	19.6023	NaN	2	2	0	0.151535	-0.157545	1	NaN	1	NaN	Afu8g00530	Afu8g00530	Afu8g00530	Putative alpha/beta hydrolase;member of the pseurotin A gene cluster;hypoxia induced protein
3	3	4.9	58.087	0	17.978	5	18.8831	18.7065	NaN	2	2	0	0.698804	-0.176558	1	NaN	1	NaN	Afu6g07340	Afu6g07340	Afu6g07340	Ortholog(s) have kynurenine 3-monooxygenase activity
2	2	6.9	37.465	0	13.714	6	19.1593	18.9077	NaN	2	2	0	0.321211	-0.251659	1	NaN	1	NaN	Afu3g13440	Afu3g13440	Afu3g13440	Stomatin family protein;hypoxia induced protein
2	2	2.7	100.68	0	12.461	2	19.0393	18.7706	NaN	2	2	0	0.391101	-0.268608	1	NaN	1	NaN	Afu2g02560	Afu2g02560	Afu2g02560	Ortholog(s) have role in establishment or maintenance of cell polarity and cytosol localization
2	2	2.5	93.31	0	23.489	5	18.5725	18.9884	NaN	2	1	0	1	0.415921	1	NaN	1	NaN	Afu6g05130	Afu6g05130	Afu6g05130	Ortholog(s) have cytosol, mitotic spindle, nucleus localization
2	2	2.1	99.724	0	12.009	4	18.7027	18.6131	NaN	2	1	0	1	-0.0896664	1	NaN	1	NaN	Afu3g10360	Afu3g10360	Afu3g10360	Ortholog(s) have protein transporter activity and role in intracellular protein transport, protein retention in Golgi apparatus, retrograde transport, endosome to Golgi
2	2	5.8	56.457	0	12.694	2	19.156	18.9819	NaN	2	1	0	1	-0.174156	1	NaN	1	NaN	Afu1g02150	Afu1g02150	Afu1g02150	Ortholog(s) have glycerol-3-phosphate dehydrogenase [NAD+] activity and role in NADH oxidation, cell-abiotic substrate adhesion, glycerol biosynthetic process, intracellular accumulation of glycerol
2	2	2.7	91.37	0	13.676	2	19.333	19.1094	NaN	2	1	0	1	-0.223602	1	NaN	1	NaN	Afu1g12340	Afu1g12340	Afu1g12340	Putative carnitine acetyl transferase with a predicted role in acetate metabolism;transcript up-regulated in conidia upon exposure to neutrophils
4	4	8.5	61.031	0	25.378	5	19.7462	19.302	NaN	2	1	0	1	-0.44419	1	NaN	1	NaN	Afu1g06710	Afu1g06710	Afu1g06710	Ortholog(s) have chaperonin-containing T-complex, nucleus localization
2	2	2.1	121.27	0	13.094	4	19.5217	18.8332	NaN	2	1	0	1	-0.688443	1	NaN	1	NaN	Afu2g03700	Afu2g03700	hmg1	Hydroxymethylglutaryl-CoA (HMG-CoA) reductase;SrbA-regulated during hypoxia
2	2	5.2	57.552	0.0015432	11.668	3	19.7813	18.998	NaN	2	1	0	1	-0.783244	1	NaN	1	NaN	Afu3g07830	Afu3g07830	Afu3g07830	Ortholog(s) have unfolded protein binding activity, role in protein folding and chaperonin-containing T-complex, nucleus localization
3	3	6.1	62.271	0	18.59	4	19.8934	19.1054	NaN	2	1	0	1	-0.788	1	NaN	1	NaN	Afu3g11120	Afu3g11120	Afu3g11120	Glutamate decarboxylase;SrbA-regulated during hypoxia
3	3	4.7	82.473	0	18.833	4	20.5328	18.8961	NaN	2	1	0	1	-1.63666	1	NaN	1	NaN	Afu4g11360	Afu4g11360	Afu4g11360	Ortholog(s) have endoplasmic reticulum localization
2	2	20.4	17.668	0	12.441	3	20.423	18.773	NaN	2	1	0	1	-1.65003	1	NaN	1	NaN	Afu1g08960	Afu1g08960	Afu1g08960	Ortholog of A. nidulans FGSC A4 : AN1383, A. niger CBS 513.88 : An08g00450, A. oryzae RIB40 : AO090005001630, Aspergillus wentii : Aspwe1_0048794 and Aspergillus sydowii : Aspsy1_0025360
2	2	19.9	22.812	0	11.94	3	21.074	NaN	NaN	2	0	0	1	NaN	1	NaN	1	0	Afu1g04320	Afu1g04320	Afu1g04320	Ribosomal protein S8
2	2	3.2	85.749	0	12.989	4	20.5264	NaN	NaN	2	0	0	1	NaN	1	NaN	1	0	Afu1g07690	Afu1g07690	pmt2	Protein O-mannosyltransferase;essential gene;12 predicted transmembrane domains
2	2	6.5	44.243	0	12.383	2	19.1746	NaN	NaN	2	0	0	1	NaN	1	NaN	1	0	Afu2g12580	Afu2g12580	Afu2g12580	Ortholog(s) have endoplasmic reticulum localization
2	2	1.5	101.67	0.0015798	11.893	2	19.8807	NaN	NaN	2	0	0	1	NaN	1	NaN	1	0	Afu3g14420	Afu3g14420	chsG	Putative class III chitin synthase;predicted gene pair with AFUA_5G00760
2	2	3.3	52.221	0.0015873	11.916	2	19.723	NaN	NaN	2	0	0	1	NaN	1	NaN	1	0	Afu5g08130	Afu5g08130	Afu5g08130	Ortholog(s) have P-P-bond-hydrolysis-driven protein transmembrane transporter activity, peptide transporter activity, signal sequence binding activity
2	2	15.8	27.643	0	12.455	4	22.9338	NaN	NaN	2	0	0	1	NaN	1	NaN	1	0	Afu5g12180	Afu5g12180	Afu5g12180	Ortholog(s) have GTPase activator activity, Ran GTPase binding activity
2	2	2.9	61.132	0	12.119	4	21.2644	NaN	NaN	2	0	0	1	NaN	1	NaN	1	0	AfuMt00080	AfuMt00080	AfuMt00080	Ortholog(s) have cytochrome-c oxidase activity, role in aerobic respiration, mitochondrial electron transport, cytochrome c to oxygen and mitochondrial respiratory chain complex IV localization

## Sheet: Decreased DTG_Zn v DTG
Table S2: Proteins with lower abundance in A. fumigatus aggregates when exposed to DTG/Zn2+ in vitro compared to DTG (Quantitative and Qualitative results)
Peptides	Unique peptides	Sequence coverage [%]	Mol. weight [kDa]	Q-value	Score	MS/MS Count	Mean Control	Mean DTG	Mean DTG_Zn	Valid values Control	Valid values DTG	Valid values DTG_Zn	Student's T-test p-value DTG v Control	Log2(Fold Change) DTG v Control	Student's T-test p-value DTG_Zn v Control	Log2(Fold Change) DTG_Zn v Control	Student's T-test p-value DTG_Zn v DTG	-Log2(Fold Change) DTG_Zn v DTG	Protein IDs	Majority protein IDs	Gene Name	Protein Function
14	14	34.7	39.791	0	277.79	44	23.374	25.8538	21.6331	3	3	3	0.00214271	2.47984	0.00160081	-1.74085	0.000370038	-4.22069	Afu3g11690	Afu3g11690	Afu3g11690	Putative class II fructose-bisphosphate aldolase;immunoreactive protein;reacts with rabbit immunosera exposed to A. fumigatus conidia;hypoxia induced protein
18	18	37.3	41.479	0	162.47	46	21.7009	24.2278	20.844	3	3	3	0.00444477	2.52685	0.145972	-0.856894	0.00409586	-3.38375	Afu1g06960	Afu1g06960	Afu1g06960	Putative pyruvate dehydrogenase complex subunit alpha;protein induced by hydrogen peroxide;hypoxia induced protein
10	10	34	37.826	0	115.04	17	21.1348	23.7867	20.4045	3	3	2	0.000209784	2.65192	0.0100718	-0.7303	0.00107744	-3.38222	Afu6g10120	Afu6g10120	Afu6g10120	Ortholog(s) have aldehyde dehydrogenase (NAD) activity, role in response to furfural and mitochondrion, nucleus localization
9	9	21.1	58.145	0	323.31	21	22.4839	23.7837	20.592	3	3	2	0.114691	1.2998	0.0627121	-1.8919	0.00896637	-3.1917	Afu8g05580	Afu8g05580	coaT	Putative coenzyme A transferase;transcript induced by exposure to human airway epithelial cells
13	13	26.4	51.132	0	90.879	21	21.0799	23.1593	19.9741	3	3	3	0.0360168	2.07935	0.0188088	-1.10584	0.00681189	-3.18519	Afu4g08760	Afu4g08760	Afu4g08760	Ortholog(s) have 3-deoxy-7-phosphoheptulonate synthase activity
10	10	24.9	50.255	0	216.67	31	22.5686	24.8866	21.9165	3	3	3	0.013206	2.31802	0.184372	-0.652034	0.00156939	-2.97006	Afu2g04220	Afu2g04220	hmgA	Homogentisate 1,2-dioxygenase involved in L-tyrosine degradation;induced by L-tyrosine;mutants produce less pyomelanin when grown on tyrosine as the sole carbon source;transcript induced by exposure to human airway epithelial cells
10	10	30.8	28.22	0	323.31	30	22.4617	24.4045	21.4371	3	3	3	0.00314243	1.94281	0.00980803	-1.02468	0.000600414	-2.96749	Afu2g15430	Afu2g15430	Afu2g15430	Sorbitol/xylulose reductase
10	10	29.1	37.66	0	202.78	25	22.0179	23.7963	20.8506	3	3	3	0.00112138	1.77838	0.00143503	-1.16728	0.000106088	-2.94566	Afu7g00700	Afu7g00700	Afu7g00700	Ortholog(s) have oxidoreductase activity, acting on CH-OH group of donors activity and cytosol, nucleus localization
12	12	42	31.374	0	131.33	29	21.9233	24.0199	21.1442	3	3	3	0.0140051	2.09657	0.125764	-0.779096	0.00157431	-2.87566	Afu5g08290	Afu5g08290	Afu5g08290	Ortholog(s) have intracellular localization
9	9	21.8	60.185	0	214.19	25	22.0132	23.4503	20.9827	3	3	2	0.0364146	1.43711	0.0697527	-1.0305	0.0197879	-2.46761	Afu8g04090;Afu1g00460	Afu8g04090;Afu1g00460	codA	Putative choline oxidase;AFUB_083470 choA ortholog;Afu1g00460 Afu1g00460 Ortholog(s) have intracellular localization
8	8	11.4	60.916	0	59.752	16	21.1936	23.4102	20.9619	3	3	3	0.00700041	2.21662	0.293692	-0.231681	0.00399143	-2.4483	Afu6g13540	Afu6g13540	cp3	Carboxypeptidase Y;predicted signal sequence for secretion;transcript up-regulated in conidia exposed to neutrophils;induced by growth on BSA as a sole nitrogen source
7	7	33.2	23.428	0	50.297	15	21.0748	22.689	20.3047	3	3	2	0.00541068	1.61415	0.252318	-0.77016	0.0138418	-2.38431	Afu1g14410	Afu1g14410	rpl17	60S ribosomal protein L17
22	22	38	60.501	0	323.31	59	24.0492	25.9618	23.7179	3	3	3	0.000264359	1.91258	0.141084	-0.331339	0.00018749	-2.24391	Afu3g11830	Afu3g11830	pgmA	Putative phosphoglucomutase;reacts with rabbit immunosera exposed to A. fumigatus conidia;hypoxia repressed protein;transcript up-regulated in conidia exposed to neutrophils
20	20	57.7	35.448	0	293.84	54	24.5535	25.4777	23.2759	3	3	3	0.0248319	0.924264	0.00466428	-1.27755	0.000281552	-2.20181	Afu5g09230	Afu5g09230	Afu5g09230	Putative transaldolase;abundant protein in conidia and mycelia;protein induced by hydrogen peroxide and hypoxia
6	6	43.8	16.054	0	135.7	27	22.4214	24.103	21.912	3	3	2	0.0162978	1.68164	0.3061	-0.509388	0.0161056	-2.19102	Afu8g00400	Afu8g00400	Afu8g00400	Protein of unknown function;encoded in the fma (fumagillin) secondary metabolite gene cluster
9	9	37.4	40.561	0	148.7	28	24.299	25.3579	23.2156	3	3	3	0.0545679	1.05887	0.0201442	-1.08341	0.00469936	-2.14227	Afu3g04170	Afu3g04170	Afu3g04170	Ortholog(s) have pyruvate dehydrogenase (acetyl-transferring) activity and role in acetyl-CoA biosynthetic process from pyruvate, arginine biosynthetic process, glutamine biosynthetic process
5	5	15.3	43.467	0	38.058	11	20.8126	22.7676	20.6965	2	3	2	0.00109841	1.95503	0.562118	-0.116126	0.000445049	-2.07116	Afu3g01850	Afu3g01850	Afu3g01850	Has domain(s) with predicted protein-arginine deiminase activity and role in putrescine biosynthetic process
20	20	48	46.997	0	323.31	50	23.8114	25.1029	23.0378	3	3	3	0.0240009	1.29147	0.00582558	-0.773591	0.00575491	-2.06506	Afu4g10410	Afu4g10410	Afu4g10410	Putative aspartate aminotransferase;reacts with rabbit immunosera exposed to A. fumigatus conidia;hypoxia induced protein;transcript induced in conidia exposed to neutrophils or to human airway epithelial cells
18	18	34.3	61.515	0	213.37	35	22.6115	24.331	22.3536	3	3	3	0.00796747	1.71943	0.406405	-0.257942	0.00301507	-1.97737	Afu1g06210	Afu1g06210	agm1	N-acetylphosphoglucosamine mutase, involved in chitin biosynthesis;essential
9	9	22.7	49.733	0	92.104	14	21.9398	23.3406	21.3636	3	3	3	0.0884584	1.40084	0.0838352	-0.576198	0.0298933	-1.97704	Afu2g13295	Afu2g13295	Afu2g13295	Ortholog(s) have hercynylcysteine sulfoxide lyase activity (ergothioneine-forming), hercynylselenocysteine lyase activity (selenoneine-forming) activity and role in ergothioneine biosynthetic process, selenoneine biosynthetic process
11	11	26.9	55.206	0	137.08	33	22.6801	22.8682	20.9	3	3	3	0.58386	0.188127	0.00227138	-1.78011	0.00298216	-1.96823	Afu5g06680	Afu5g06680	gatA	4-aminobutyrate aminotransferase;transcript downregulated in response to voriconazole;calcium induced
14	14	46.8	38.322	0	148.44	32	23.1035	24.5846	22.6385	3	3	3	0.00904509	1.4811	0.234174	-0.464959	0.00962047	-1.94605	Afu5g02470	Afu5g02470	nmt1	Thiamine biosynthesis protein, phoB-regulated;protein induced by H2O2;reacts with rabbit immunosera exposed to conidia;hypoxia induced protein;transcript induced by exposure to human airway epithelial cells;induced by gliotoxin
10	10	28.2	43.478	0	102.35	29	22.3353	23.6451	21.715	3	3	3	0.00456772	1.30981	0.0170514	-0.620259	0.00151203	-1.93007	Afu1g09800	Afu1g09800	Afu1g09800	Ortholog of S. cerevisiae OLA1;snoRNA Afu-304 encoded within intron 2
12	12	24.2	66.657	0	93.831	19	20.8751	22.763	20.8543	2	3	2	0.0178037	1.88788	0.947682	-0.0207882	0.0230192	-1.90866	Afu4g12920	Afu4g12920	Afu4g12920	Putative mitochondrial histidyl-tRNA synthetase;protein induced by heat shock
7	7	16.9	36.858	0	129.84	21	23.0648	24.6658	22.7969	3	3	3	0.00170169	1.601	0.136559	-0.267934	0.00091396	-1.86894	Afu5g06390	Afu5g06390	Afu5g06390	Putative adenosine kinase
7	7	14	58.147	0	57.131	18	20.2139	21.9611	20.0979	3	3	3	0.00806749	1.74717	0.786126	-0.116039	0.0132985	-1.86321	Afu4g00370	Afu4g00370	Afu4g00370	General amidase;induced by growth on BSA as a sole nitrogen source
13	11	61.8	30.702	0	208.13	22	22.9002	24.0696	22.2231	3	3	3	0.0513608	1.16934	0.245412	-0.677159	0.0263766	-1.8465	Afu6g06750	Afu6g06750	Afu6g06750	14-3-3 family protein;predicted gene pair with AFUA_2G03290 (artA)
14	14	42.2	25.586	0	323.31	51	23.5501	24.6883	22.8535	3	3	3	0.0129866	1.13819	0.0356953	-0.696639	0.00151046	-1.83482	Afu2g09210	Afu2g09210	Afu2g09210	60S ribosomal protein L10;reacts with rabbit immunosera exposed to A. fumigatus conidia
5	5	14.5	54.209	0	44.757	12	21.2559	22.928	21.0951	3	3	3	0.0106901	1.67216	0.580785	-0.160779	0.00749062	-1.83294	Afu2g05910	Afu2g05910	hxkA	Putative hexokinase;protein induced by heat shock
12	12	28.1	56.715	0	96.425	23	21.9105	22.9594	21.1391	3	3	2	0.00633385	1.04889	0.0407331	-0.771421	0.00897533	-1.82031	Afu7g02180	Afu7g02180	Afu7g02180	Ortholog(s) have UDP-N-acetylglucosamine diphosphorylase activity, role in UDP-N-acetylglucosamine biosynthetic process and cytosol, nucleus localization
45	45	56.8	86.893	0	323.31	168	25.993	27.1245	25.3551	3	3	3	0.00270219	1.13148	0.00432754	-0.637922	0.000313728	-1.7694	Afu4g07360	Afu4g07360	metH	Putative cobalamin-independent methionine synthase;protein induced by heat shock;Yap1-dependent induction in response to hydrogen peroxide;reacts with rabbit immunosera exposed to A. fumigatus conidia;no human homolog
5	5	17.8	32.122	0	157.88	31	23.692	24.0823	22.3556	3	3	3	0.101455	0.390268	0.0269375	-1.33636	0.00864	-1.72662	Afu3g13320	Afu3g13320	rps0	Putative 40S ribosomal protein S0
18	18	42.4	40.503	0	275.99	83	25.0454	25.912	24.1896	3	3	3	0.149309	0.866616	0.0641473	-0.855809	0.020326	-1.72242	Afu5g03020	Afu5g03020	Afu5g03020	60S ribosomal protein L4
5	5	14	45.088	0	49.345	11	20.7321	22.5458	20.8568	3	3	3	0.0269069	1.81366	0.749792	0.124723	0.0141881	-1.68893	Afu6g05120	Afu6g05120	Afu6g05120	Ortholog(s) have protein serine/threonine kinase activity, protein serine/threonine/tyrosine kinase activity, protein tyrosine kinase activity
15	15	32.5	50.352	0	161.46	50	22.7579	24.2561	22.5777	3	3	3	0.0120434	1.49821	0.484185	-0.180148	0.0138955	-1.67836	Afu5g08930	Afu5g08930	Afu5g08930	Putative isovaleryl-CoA dehydrogenase;ortholog of A. nidulans ivdA;transcript induced by exposure to human airway epithelial cells
9	9	20	51.671	0	105.3	17	20.8983	22.4421	20.7794	3	3	3	0.0194373	1.54387	0.783109	-0.118895	0.0260658	-1.66277	Afu1g10780	Afu1g10780	Afu1g10780	Glycine cleavage system T protein;SrbA-regulated during hypoxia
17	17	38.7	54.157	0	308.68	60	24.5592	25.6641	24.0344	3	3	3	0.0878494	1.10491	0.396546	-0.524771	0.0171668	-1.62969	Afu6g08050	Afu6g08050	gnd1	6-phosphogluconate dehydrogenase;conidia-enriched protein;protein induced by heat shock;reacts with rabbit immunosera exposed to conidia;hypoxia-induced protein;transcript induced by exposure to human airway epithelial cells
9	9	16.1	65.33	0	60.376	21	22.1466	23.2867	21.7142	3	3	3	0.0107013	1.14011	0.0647336	-0.432372	0.00226029	-1.57248	Afu4g00610	Afu4g00610	Afu4g00610	Putative aryl-alcohol dehydrogenase
18	18	42.7	62.104	0	323.31	41	23.4069	24.602	23.0351	3	3	3	0.0312406	1.19507	0.236176	-0.37182	0.0131342	-1.56689	Afu6g03730	Afu6g03730	Afu6g03730	2-methylcitrate dehydratase;hypoxia repressed protein;transcript up-regulated in conidia exposed to neutrophils and to human airway epithelial cells;no human homolog
11	11	7.5	152.28	0	156.45	23	21.7402	22.8409	21.3053	3	3	3	0.00622261	1.10067	0.259822	-0.434944	0.0052017	-1.53561	Afu1g11420	Afu1g11420	Afu1g11420	Ortholog(s) have mRNA 3-UTR binding, mRNA 5-UTR binding, translation repressor activity, nucleic acid binding activity
7	7	17.9	46.648	0	51.371	10	20.5841	21.9793	20.4461	2	3	2	0.00718362	1.39524	0.634623	-0.137925	0.0101675	-1.53317	Afu1g15450	Afu1g15450	Afu1g15450	Ortholog(s) have adenylosuccinate synthase activity, sulfinylpropanyl adenylate synthase activity, role in de novo AMP biosynthetic process, cellular response to cadmium ion, fumarate metabolic process and cytosol, nucleus localizat
5	5	9.6	67.112	0	48.678	14	21.8811	22.933	21.4316	3	3	3	0.0464391	1.05196	0.0814432	-0.449448	0.0119437	-1.5014	Afu4g11720	Afu4g11720	Afu4g11720	Putative phosphatidyl synthase;protein levels increase in response to pkaC overexpression
13	13	13.3	118.56	0	118.38	20	20.5403	22.2197	20.7597	3	3	2	0.00711083	1.67939	0.61045	0.219337	0.0382525	-1.46006	Afu4g07910	Afu4g07910	Afu4g07910	Putative zinc-dependent peptidase
11	11	30.1	29.2	0	131.94	25	22.8328	23.1156	21.6639	3	3	3	0.0757443	0.282825	0.00281469	-1.16889	0.00126344	-1.45172	Afu5g05450	Afu5g05450	rps1	40S ribosomal protein S3Ae;40S ribosomal protein S1;reacts with rabbit immunosera exposed to A. fumigatus conidia
3	3	5.3	59.479	0	24.78	8	20.5077	21.7425	20.377	2	3	2	0.0244417	1.23483	0.460904	-0.130674	0.0220919	-1.3655	Afu3g12690	Afu3g12690	glfA	Putative UDP-galactopyranose mutase, enzyme in the first step of galactofuranose biosynthesis;mutant unmasks mannan residues on the cell surface, which is thought to contribute to increased cell adhesion
17	17	25	80.723	0	139.46	36	22.0853	23.3343	21.9892	3	3	3	0.00140318	1.24896	0.640174	-0.0961577	0.00274011	-1.34512	Afu2g14030	Afu2g14030	Afu2g14030	Ortholog(s) have arginine-tRNA ligase activity, role in arginyl-tRNA aminoacylation and cytosol, mitochondrion localization
5	5	14.9	48.465	0	49.925	7	21.6977	22.6851	21.4889	2	3	2	0.0572162	0.987371	0.416535	-0.208795	0.0440003	-1.19617	Afu4g13720	Afu4g13720	mpkA	Mitogen-activated protein kinase;activated by phosphorylation;role in cell wall signaling and the oxidative stress response;mpkA(p)-lacZ expression increased by cell wall disturbing compounds;required for adaptation to iron starvation
15	15	28.8	56.924	0	122.3	30	23.0273	23.7065	22.5364	3	3	3	0.0014964	0.679225	0.307193	-0.490899	0.0487883	-1.17012	Afu7g01830	Afu7g01830	ugp1	UTP-glucose-1-phosphate uridylyltransferase;induced by hydrogen peroxide;hypoxia repressed protein
7	7	48.3	15.971	0	170.67	18	22.2501	22.6431	21.4799	3	3	3	0.315239	0.392967	0.0718608	-0.770267	0.0265595	-1.16323	Afu2g10500	Afu2g10500	Afu2g10500	40S ribosomal protein Rps16
13	13	28.6	46.133	0	101.08	30	21.9082	23.1749	22.0339	3	3	3	0.00785525	1.26667	0.748104	0.125626	0.0169636	-1.14104	Afu2g04310	Afu2g04310	Afu2g04310	Argininosuccinate synthase;hypoxia induced protein
9	9	14.9	69.19	0	69.41	23	21.47	21.7011	20.5613	3	3	2	0.129499	0.231133	0.00857013	-0.908674	0.00113348	-1.13981	Afu1g05610	Afu1g05610	Afu1g05610	Putative protein phosphotase 2a 65kd regulatory subunit;conidia-enriched protein;protein induced by heat shock
25	25	26.7	106.23	0	240.68	52	22.8573	23.8418	22.7105	3	3	3	0.0280415	0.9845	0.660655	-0.146793	0.0155799	-1.13129	Afu4g09030	Afu4g09030	Afu4g09030	Putative aminopeptidase;conidia-enriched protein;protein induced by heat shock;transcript induced by exposure to human airway epithelial cells;induced by gliotoxin exposure
16	16	21	74.789	0	178.35	39	22.5565	24.0816	22.9549	3	3	3	0.0049302	1.52512	0.264511	0.398413	0.033283	-1.12671	Afu7g05930	Afu7g05930	mepB	Putative metallopeptidase with similarity to mammalian thimet oligopeptidases;conidia-enriched protein;transcript induced by exposure to human airway epithelial cells and by growth on BSA as a sole nitrogen source
13	13	31.3	51.182	0	195.87	46	23.9752	25.2205	24.1103	3	3	3	0.000968464	1.24533	0.267989	0.135041	0.00252694	-1.11029	Afu2g09650;Afu6g02490;Afu1g04160	Afu2g09650	Afu2g09650	Aspartate transaminase;induced by L-tyrosine;transcript up-regulated in conidia exposed to neutrophils
8	8	32.9	17.867	0	97.324	22	22.4227	22.9053	21.8049	3	3	2	0.197073	0.482554	0.136517	-0.617795	0.0499915	-1.10035	Afu6g13550	Afu6g13550	Afu6g13550	Ribosomal protein S13p/S18e
11	11	29.3	52.28	0	94.76	27	22.1989	22.7279	21.635	3	3	3	0.0982752	0.529074	0.0752906	-0.563882	0.000307849	-1.09296	Afu2g11150	Afu2g11150	Afu2g11150	Putative secretory-pathway GDP dissociation inhibitor;transcript and protein levels increase upon exposure to amphotericin B
20	20	43.5	65.027	0	304.85	68	24.2578	24.8605	23.7914	3	3	3	0.0882264	0.602702	0.0987436	-0.466448	0.0353904	-1.06915	Afu4g07690	Afu4g07690	Afu4g07690	Putative phosphoribosylaminoimidazole-carboxamide formyltransferase/IMP cyclohydrolase;hypoxia repressed protein
5	5	12.4	56.541	0	42.839	10	19.8982	21.4884	NaN	3	3	0	0.0155013	1.59017	1	NaN	1	NaN	Afu3g03020	Afu3g03020	Afu3g03020	Putative phosphoglucomutase
7	7	12.5	58.936	0	57.102	11	21.2797	22.3234	NaN	3	3	0	0.047367	1.04365	1	NaN	1	NaN	Afu3g08470	Afu3g08470	Afu3g08470	Glucose-6-phosphate 1-dehydrogenase
6	6	18.4	38.093	0	40.749	11	20.1775	21.0673	NaN	3	3	0	0.000615712	0.889797	1	NaN	1	NaN	Afu6g07390	Afu6g07390	lysB	Putative homoisocitrate dehydrogenase with a role in lysine metabolism;hypoxia induced protein
4	4	14.1	33.845	0	39.66	8	20.5225	21.3736	NaN	3	3	0	0.0038741	0.851094	1	NaN	1	NaN	Afu5g02240	Afu5g02240	Afu5g02240	NAD dependent epimerase/dehydratase family protein
7	7	11.6	73.154	0	72.621	14	20.4735	21.2252	NaN	3	3	0	0.0107349	0.751766	1	NaN	1	NaN	Afu2g12530	Afu2g12530	Afu2g12530	Putative carnitine acetyl transferase with a predicted role in acetate metabolism;transcript up-regulated in conidia exposed to neutrophils
2	2	12.6	18.627	0	11.981	4	21.3164	20.612	NaN	3	3	0	0.0430008	-0.704414	1	NaN	1	NaN	Afu1g12070	Afu1g12070	Afu1g12070	Ortholog(s) have glycine dehydrogenase (decarboxylating) activity, role in glycine catabolic process, one-carbon metabolic process, protein lipoylation and mitochondrion localization
8	8	23.5	43.003	0	66.023	10	20.4978	21.813	NaN	3	3	0	0.050003	1.31523	1	NaN	1	NaN	Afu2g10660	Afu2g10660	mpdA	Putative mannitol-1-phosphate dehydrogenase;conidia-enriched protein;protein induced by heat shock;reacts with rabbit immunosera exposed to conidia;no human homolog
4	4	11.1	42.117	0	26.888	10	20.0939	20.9953	NaN	3	3	0	0.0844683	0.9014	1	NaN	1	NaN	Afu3g01450	Afu3g01450	Afu3g01450	Putative 3-methyl-2-oxobutanoate dehydrogenase;transcript induced by voriconazole
4	4	18.4	24.252	0	138.87	12	21.9993	22.5391	NaN	3	3	0	0.179881	0.539796	1	NaN	1	NaN	Afu1g11710	Afu1g11710	Afu1g11710	Ribosomal protein L1
3	3	8.8	46.82	0	20.217	3	20.2661	20.119	NaN	3	3	0	0.543659	-0.147072	1	NaN	1	NaN	Afu5g05540	Afu5g05540	nap1	Putative nucleosome assembly protein
6	6	6.6	108.68	0	39.324	13	20.3857	20.1029	NaN	3	3	0	0.0925021	-0.282787	1	NaN	1	NaN	Afu5g09250	Afu5g09250	Afu5g09250	Ortholog(s) have cytosol localization
2	2	18.1	16.761	0	20.324	4	20.177	19.5408	NaN	3	3	0	0.0814126	-0.636255	1	NaN	1	NaN	Afu3g05600	Afu3g05600	Afu3g05600	60S ribosomal protein L27a
9	9	27.8	38.599	0	69.254	16	19.8382	21.9541	NaN	2	3	0	0.00299821	2.11588	1	NaN	1	NaN	Afu1g07040	Afu1g07040	Afu1g07040	Ortholog of A. nidulans FGSC A4 : AN10646, A. niger CBS 513.88 : An07g09600, A. oryzae RIB40 : AO090012000956, Aspergillus wentii : Aspwe1_0111941 and Aspergillus terreus NIH2624 : ATET_02639
3	3	7.8	46.227	0	39.162	11	19.8201	21.2905	NaN	2	3	0	0.014424	1.47034	1	NaN	1	NaN	Afu3g07680	Afu3g07680	Afu3g07680	Putative ran GTPase activating protein
5	5	13.4	44.007	0	46.137	5	19.4988	20.4321	NaN	2	3	0	0.0853228	0.93327	1	NaN	1	NaN	Afu2g10420	Afu2g10420	Afu2g10420	Has domain(s) with predicted catalytic activity and role in metabolic process
4	4	11.4	35.803	0	45.701	11	21.0989	21.9272	NaN	2	3	0	0.0727648	0.828332	1	NaN	1	NaN	Afu5g12780	Afu5g12780	Afu5g12780	Ortholog of A. nidulans FGSC A4 : AN8430, A. niger CBS 513.88 : An18g00330, A. oryzae RIB40 : AO090010000134, Neosartorya fischeri NRRL 181 : NFIA_074390 and Aspergillus wentii : Aspwe1_0449405
4	4	13.5	46.596	0	62.025	7	19.5019	20.238	NaN	2	3	0	0.149657	0.736033	1	NaN	1	NaN	Afu3g04150	Afu3g04150	Afu3g04150	Ortholog(s) have enoyl-[acyl-carrier-protein] reductase activity, role in aerobic respiration, fatty acid biosynthetic process and mitochondrion localization
2	2	9.9	21.437	0	15.031	2	19.3168	19.9534	NaN	2	3	0	0.277321	0.636572	1	NaN	1	NaN	Afu2g03040	Afu2g03040	Afu2g03040	Ribosomal protein L34
2	2	3.6	51.874	0	12.799	4	19.4919	19.9515	NaN	2	3	0	0.352758	0.459614	1	NaN	1	NaN	Afu3g06550	Afu3g06550	Afu3g06550	Has domain(s) with predicted phosphatase activity, phosphoserine phosphatase activity and role in L-serine biosynthetic process, metabolic process
2	2	7.2	40.915	0	23.65	3	19.2139	19.6277	NaN	2	3	0	0.20742	0.413791	1	NaN	1	NaN	Afu1g02110	Afu1g02110	Afu1g02110	3-deoxy-7-phosphoheptulonate synthase;no human homolog
3	3	6.6	52.69	0	24.331	6	19.4827	19.8964	NaN	2	3	0	0.393566	0.413641	1	NaN	1	NaN	Afu4g11190	Afu4g11190	Afu4g11190	Ortholog(s) have cytosol, nucleus localization
4	4	4	114.62	0	26.287	6	20.0511	20.3876	NaN	2	3	0	0.523197	0.336553	1	NaN	1	NaN	Afu6g08920	Afu6g08920	Afu6g08920	Assimilatory sulfite reductase
3	3	7.9	58.603	0	18.975	8	19.6286	19.8832	NaN	2	3	0	0.807458	0.254591	1	NaN	1	NaN	Afu2g13030	Afu2g13030	Afu2g13030	Ortholog(s) have phenylalanine-tRNA ligase activity, role in mitochondrial phenylalanyl-tRNA aminoacylation and mitochondrion localization
3	3	8.3	49.215	0	23	7	19.3038	19.5558	NaN	2	3	0	0.279852	0.251953	1	NaN	1	NaN	Afu5g06500	Afu5g06500	Afu5g06500	Acyl-CoA dehydrogenase family protein with a predicted role in fatty acid beta oxidation;induced by exposure to artemisinin
4	4	15.3	38.192	0	29.273	4	19.333	19.5793	NaN	2	3	0	0.676844	0.246267	1	NaN	1	NaN	Afu2g17430	Afu2g17430	Afu2g17430	Ortholog(s) have nitronate monooxygenase activity and role in denitrification pathway, detoxification of nitrogen compound
4	4	11.4	53.562	0	25.865	4	19.0218	19.2342	NaN	2	3	0	0.573398	0.212385	1	NaN	1	NaN	Afu6g10470	Afu6g10470	zpr1	Putative zinc finger protein;transcript highly induced during conidial germination
4	4	8.4	61.612	0	25.548	4	19.481	19.5996	NaN	2	3	0	0.620796	0.118598	1	NaN	1	NaN	Afu6g10600	Afu6g10600	Afu6g10600	Ortholog(s) have cytosol, nucleus localization
5	5	9.4	77.377	0	34.86	5	20.4041	20.0816	NaN	2	3	0	0.373748	-0.322519	1	NaN	1	NaN	Afu2g13250	Afu2g13250	trpB	Putative bifunctional tryptophan synthase
4	4	13.2	37.853	0	31.973	7	19.6924	21.9143	NaN	1	3	0	1	2.22197	1	NaN	1	NaN	Afu1g04620	Afu1g04620	Afu1g04620	Putative zinc-containing alcohol dehydrogenase;reacts with rabbit immunosera exposed to A. fumigatus conidia;hypoxia induced protein;transcript up-regulated in conidia exposed to neutrophils;repressed by gliotoxin exposure
5	5	21	29.061	0	56.188	9	20.4179	22.0802	NaN	1	3	0	1	1.66227	1	NaN	1	NaN	Afu5g00720	Afu5g00720	Afu5g00720	Has domain(s) with predicted N-acetyltransferase activity
7	7	24.3	36.348	0	55.148	9	19.1979	20.8267	NaN	1	3	0	1	1.62878	1	NaN	1	NaN	Afu8g00850	Afu8g00850	Afu8g00850	Ortholog(s) have dihydroorotase activity and role in de novo pyrimidine nucleobase biosynthetic process, pyrimidine nucleotide biosynthetic process
3	3	9.1	55.443	0	18.792	4	17.9526	19.1871	NaN	1	3	0	1	1.23446	1	NaN	1	NaN	Afu6g12250	Afu6g12250	Afu6g12250	Ortholog(s) have mitochondrion localization
5	5	24.5	21.705	0	52.981	5	19.8253	20.7228	NaN	1	3	0	1	0.89747	1	NaN	1	NaN	Afu8g04650	Afu8g04650	Afu8g04650	Ortholog(s) have 3-hydroxyanthranilate 3,4-dioxygenase activity, role in de novo NAD biosynthetic process from tryptophan and cytoplasm localization
4	4	12.4	37.702	0	38.261	7	20.1382	20.7829	NaN	1	3	0	1	0.644704	1	NaN	1	NaN	Afu2g09850	Afu2g09850	Afu2g09850	Putative oxidoreductase, 2-nitropropane dioxygenase family;transcript up-regulated in conidia exposed to neutrophils
3	3	14.9	36.387	0	19.056	3	19.325	19.9426	NaN	1	3	0	1	0.61758	1	NaN	1	NaN	Afu1g03060	Afu1g03060	Afu1g03060	Ortholog(s) have actin filament binding activity and role in barbed-end actin filament capping, filamentous growth, mitotic actomyosin contractile ring contraction
2	2	10.9	27.92	0	18.101	3	19.2715	19.852	NaN	1	3	0	1	0.580494	1	NaN	1	NaN	Afu3g00730	Afu3g00730	Afu3g00730	Protein with Yap1-dependent induction in response to hydrogen peroxide
2	2	10.8	28.313	0	21.732	3	19.0192	19.5847	NaN	1	3	0	1	0.565505	1	NaN	1	NaN	Afu6g06460	Afu6g06460	Afu6g06460	Has domain(s) with predicted catalytic activity and role in metabolic process
3	3	6.4	51.774	0	43.358	4	19.8276	20.3457	NaN	1	3	0	1	0.518161	1	NaN	1	NaN	Afu2g15660	Afu2g15660	Afu2g15660	Has domain(s) with predicted oxidoreductase activity, oxidoreductase activity, acting on the aldehyde or oxo group of donors, NAD or NADP as acceptor activity and role in oxidation-reduction process
5	5	12.2	59.471	0	44.588	7	19.6981	20.2045	NaN	1	3	0	1	0.506418	1	NaN	1	NaN	Afu3g01110	Afu3g01110	gua1	Putative GMP synthase ([glutamine-hydrolyzing);Yap1-dependent induction in response to hydrogen peroxide
4	4	9.9	45.534	0	25.198	7	19.8997	20.3925	NaN	1	3	0	1	0.492812	1	NaN	1	NaN	Afu2g04200	Afu2g04200	hppD	4-hydroxyphenylpyruvate dioxygenase involved in the L-tyrosine degradation pathway;induced by L-tyrosine
3	3	9.6	42.641	0	21.267	5	20.2528	20.72	NaN	1	3	0	1	0.467192	1	NaN	1	NaN	Afu1g07520	Afu1g07520	Afu1g07520	Ortholog(s) have cytosol, nucleus localization
2	2	3.8	51.222	0	14.995	4	19.6768	20.0857	NaN	1	3	0	1	0.408949	1	NaN	1	NaN	Afu2g06110	Afu2g06110	Afu2g06110	Ortholog(s) have role in chromatin silencing at centromere, histone acetylation, histone exchange, mitotic sister chromatid biorientation and Ino80 complex, NuA4 histone acetyltransferase complex, Swr1 complex localization
4	4	10.5	71.791	0	45.432	6	19.7076	19.9198	NaN	1	3	0	1	0.212247	1	NaN	1	NaN	Afu1g03940	Afu1g03940	Afu1g03940	Ortholog(s) have role in SRP-dependent cotranslational protein targeting to membrane, translocation and cytosol, nuclear periphery, signal recognition particle, endoplasmic reticulum targeting localization
3	3	2.8	138.6	0	18.171	4	19.4277	19.217	NaN	1	3	0	1	-0.210662	1	NaN	1	NaN	Afu6g08300	Afu6g08300	Afu6g08300	Ortholog(s) have role in regulation of circadian rhythm
4	4	4.9	135.21	0	32.198	7	20.0886	19.6748	NaN	1	3	0	1	-0.413787	1	NaN	1	NaN	Afu6g10380	Afu6g10380	canA	Putative cullin binding protein;transcript induced by exposure to human airway epithelial cells
3	3	6.2	68.86	0	19.448	7	20.7182	19.9587	NaN	1	3	0	1	-0.759421	1	NaN	1	NaN	Afu8g05140	Afu8g05140	Afu8g05140	Ortholog(s) have protein disulfide isomerase activity, protein disulfide oxidoreductase activity, role in protein folding and endoplasmic reticulum membrane localization
4	4	8.4	64.991	0	32.3	9	NaN	21.2206	NaN	0	3	0	1	NaN	1	0	1	NaN	Afu1g03550	Afu1g03550	ilv3B	Putative mitochondrial dihydroxy acid dehydratase;SrbA-regulated during hypoxia
3	3	10	39.459	0	22.035	9	NaN	21.2142	NaN	0	3	0	1	NaN	1	0	1	NaN	Afu1g13370	Afu1g13370	Afu1g13370	Putative aldo-keto reductase;transcript up-regulated in conidia exposed to neutrophils
3	3	13.4	30.397	0	19.618	4	NaN	19.6805	NaN	0	3	0	1	NaN	1	0	1	NaN	Afu2g02490	Afu2g02490	Afu2g02490	Ortholog of A. nidulans FGSC A4 : AN0401, Aspergillus flavus NRRL 3357 : AFL2T_08730, Aspergillus versicolor : Aspve1_0035846 and Aspergillus fumigatus A1163 : AFUB_019590
3	3	9.3	54.725	0	62.351	7	NaN	21.7938	NaN	0	3	0	1	NaN	1	0	1	NaN	Afu2g11940	Afu2g11940	ade13	Adenylosuccinate lyase;reacts with rabbit immunosera exposed to A. fumigatus conidia
2	2	7	32.365	0	13.025	3	NaN	19.9853	NaN	0	3	0	1	NaN	1	0	1	NaN	Afu2g13470	Afu2g13470	Afu2g13470	Ortholog(s) have nucleotidase activity, role in pyrimidine nucleobase metabolic process and cytosol, nucleus localization
3	3	6.8	58.073	0	17.97	4	NaN	20.3248	NaN	0	3	0	1	NaN	1	0	1	NaN	Afu2g13630	Afu2g13630	aro8	Putative amino transferase;immunoreactive protein;transcript induced by exposure to human airway epithelial cells and by growth on BSA as a sole nitrogen source
2	2	4.5	60.059	0	14.763	3	NaN	18.6687	NaN	0	3	0	1	NaN	1	0	1	NaN	Afu4g08600	Afu4g08600	Afu4g08600	Putative aldehyde dehydrogenase (NAD(P)+)
2	2	3.7	68.281	0	19.223	4	NaN	20.2846	NaN	0	3	0	1	NaN	1	0	1	NaN	Afu4g09010	Afu4g09010	Afu4g09010	Ortholog(s) have U1 snRNP localization
2	2	3.9	56.569	0	17.345	6	NaN	20.3883	NaN	0	3	0	1	NaN	1	0	1	NaN	Afu4g10330	Afu4g10330	Afu4g10330	Ortholog(s) have protein farnesyltransferase activity, role in protein farnesylation and cytosol, nucleus, protein farnesyltransferase complex localization
2	2	4.4	60.382	0	12.35	3	NaN	19.5024	NaN	0	3	0	1	NaN	1	0	1	NaN	Afu5g02230	Afu5g02230	Afu5g02230	Putative actin interacting protein;protein induced by hydrogen peroxide
5	5	19.4	41.977	0	63.467	6	NaN	21.771	NaN	0	3	0	1	NaN	1	0	1	NaN	Afu6g12480	Afu6g12480	nif3	NGG1 interacting factor
2	2	4.6	44.152	0	14.075	3	18.4289	18.9507	NaN	3	2	0	0.512792	0.521832	1	NaN	1	NaN	Afu1g10810	Afu1g10810	Afu1g10810	Ortholog(s) have role in calcium ion transport into cytosol and cytosol, plasma membrane localization
3	3	4.5	96.106	0	27.429	9	20.3459	20.5605	NaN	3	2	0	0.80803	0.214554	1	NaN	1	NaN	Afu4g06690	Afu4g06690	Afu4g06690	Ortholog(s) have CDP reductase activity, nucleoside diphosphate kinase activity, nucleotide binding activity
2	2	1.2	163.98	0	13.277	5	20.0884	19.2564	NaN	3	2	0	0.0553325	-0.832	1	NaN	1	NaN	Afu2g09490	Afu2g09490	Afu2g09490	Eukaryotic translation initiation factor subunit eIF-4F
2	2	4.8	56.388	0	12.94	4	20.615	19.3897	NaN	3	2	0	0.173534	-1.22536	1	NaN	1	NaN	Afu1g03150	Afu1g03150	erg24	Putative c-14 sterol reductase with a predicted role in ergosterol biosynthesis;induced by exposure to artemisinin;SrbA-regulated during hypoxia
3	3	13.6	28.323	0	17.814	3	19.4654	20.1371	NaN	2	2	0	0.0165125	0.671733	1	NaN	1	NaN	Afu1g04900	Afu1g04900	Afu1g04900	Proliferating cell nuclear antigen (PCNA);conidia-enriched protein
4	4	8.9	56.998	0	29.047	5	18.8849	20.2793	NaN	2	2	0	0.166616	1.39447	1	NaN	1	NaN	Afu1g16480	Afu1g16480	Afu1g16480	Ortholog(s) have mitochondrion localization
3	3	4.8	90.864	0	20.66	4	19.6909	20.3396	NaN	2	2	0	0.0989655	0.648668	1	NaN	1	NaN	Afu5g09610	Afu5g09610	Afu5g09610	Ortholog(s) have role in spore germination and cytosol localization
5	5	14.7	45.973	0	61.521	8	20.2187	20.6092	NaN	2	2	0	0.0605977	0.390522	1	NaN	1	NaN	Afu4g06160	Afu4g06160	Afu4g06160	Branched-chain-amino-acid transaminase;SrbA-regulated during hypoxia
3	3	5.6	50.816	0	19.485	3	19.1213	19.4938	NaN	2	2	0	0.304248	0.372462	1	NaN	1	NaN	Afu2g01750	Afu2g01750	Afu2g01750	Has domain(s) with predicted aminopeptidase activity, metalloexopeptidase activity and role in cellular process, proteolysis
3	3	3.7	117.77	0	22.262	5	19.8564	19.7032	NaN	2	2	0	0.709932	-0.153186	1	NaN	1	NaN	Afu7g05660	Afu7g05660	Afu7g05660	Putative translation elongation factor eEF-3;protein induced by heat shock and hypoxia
3	3	7.4	49.101	0	20.961	2	19.7598	19.6023	NaN	2	2	0	0.151535	-0.157545	1	NaN	1	NaN	Afu8g00530	Afu8g00530	Afu8g00530	Putative alpha/beta hydrolase;member of the pseurotin A gene cluster;hypoxia induced protein
3	3	4.9	58.087	0	17.978	5	18.8831	18.7065	NaN	2	2	0	0.698804	-0.176558	1	NaN	1	NaN	Afu6g07340	Afu6g07340	Afu6g07340	Ortholog(s) have kynurenine 3-monooxygenase activity
2	2	6.9	37.465	0	13.714	6	19.1593	18.9077	NaN	2	2	0	0.321211	-0.251659	1	NaN	1	NaN	Afu3g13440	Afu3g13440	Afu3g13440	Stomatin family protein;hypoxia induced protein
2	2	2.7	100.68	0	12.461	2	19.0393	18.7706	NaN	2	2	0	0.391101	-0.268608	1	NaN	1	NaN	Afu2g02560	Afu2g02560	Afu2g02560	Ortholog(s) have role in establishment or maintenance of cell polarity and cytosol localization
4	4	5.8	89.801	0	25.23	4	18.8591	19.7958	NaN	1	2	0	1	0.936719	1	NaN	1	NaN	Afu4g13530	Afu4g13530	Afu4g13530	Ortholog(s) have alpha,alpha-trehalase activity, calcium ion binding activity
3	3	4.8	76.829	0	20.627	5	19.5155	20.4224	NaN	1	2	0	1	0.906927	1	NaN	1	NaN	Afu1g08810	Afu1g08810	Afu1g08810	Mitochondrial glycerol-3-phosphate dehydrogenase;hypoxia repressed protein
3	3	8	40.957	0	19.407	3	19.0447	19.822	NaN	1	2	0	1	0.7773	1	NaN	1	NaN	Afu1g05060	Afu1g05060	Afu1g05060	Ortholog(s) have uroporphyrinogen decarboxylase activity, role in heme biosynthetic process and cytosol, nucleus localization
2	2	3.9	47.454	0	13.08	4	19.6669	19.9179	NaN	1	2	0	1	0.251019	1	NaN	1	NaN	Afu1g14850	Afu1g14850	Afu1g14850	Putative acyl-coA dehydrogenase with a predicted role in beta oxidation of fatty acids;transcript up-regulated in conidia exposed to neutrophils
2	2	7.2	37.206	0	14.272	6	20.7065	20.6356	NaN	1	2	0	1	-0.0708647	1	NaN	1	NaN	Afu6g10260	Afu6g10260	akr1	Putative aldehyde reductase;abundant protein in conidia;transcript up-regulated in conidia exposed to neutrophils and to human airway epithelial cells
2	2	3.2	61.724	0	12.929	3	19.4603	19.1353	NaN	1	2	0	1	-0.325022	1	NaN	1	NaN	Afu2g16020	Afu2g16020	Afu2g16020	Putative heat shock protein;transcript induced during conidial germination
3	3	4.1	68.782	0	18.383	3	20.4163	19.7364	NaN	1	2	0	1	-0.679864	1	NaN	1	NaN	Afu6g03770	Afu6g03770	Afu6g03770	Ortholog(s) have role in reciprocal meiotic recombination and cytosol, endoplasmic reticulum, nucleus localization
4	4	10.7	53.848	0	23.213	4	NaN	20.0649	NaN	0	2	0	1	NaN	1	0	1	NaN	Afu1g07200	Afu1g07200	Afu1g07200	Has domain(s) with predicted catalytic activity, heme binding, oxidoreductase activity
2	2	5.3	55.222	0	12.692	2	NaN	18.9401	NaN	0	2	0	1	NaN	1	0	1	NaN	Afu1g14920	Afu1g14920	Afu1g14920	Putative peptidase D;induced by growth on BSA as a sole nitrogen source
2	2	2.9	38.185	0.001506	11.23	2	NaN	19.5306	NaN	0	2	0	1	NaN	1	0	1	NaN	Afu1g17040	Afu1g17040	Afu1g17040	Ortholog(s) have cytosol, nucleus localization
2	2	4.5	49.387	0	13.284	2	NaN	19.5117	NaN	0	2	0	1	NaN	1	0	1	NaN	Afu2g01220	Afu2g01220	Afu2g01220	Putative GTP cyclohydrolase II;transcript up-regulated in conidia exposed to neutrophils
4	4	17.3	25.311	0	26.412	5	NaN	20.2328	NaN	0	2	0	1	NaN	1	0	1	NaN	Afu2g04240	Afu2g04240	maiA	maleylacetoacetate isomerase involved in L-tyrosine degradation
2	2	4.2	72.832	0	19.306	2	NaN	19.3157	NaN	0	2	0	1	NaN	1	0	1	NaN	Afu2g08280	Afu2g08280	maeA	Putative NADP-dependent malic enzyme
2	2	4.3	52.855	0.0015699	11.87	2	NaN	17.619	NaN	0	2	0	1	NaN	1	0	1	NaN	Afu2g13710	Afu2g13710	Afu2g13710	NADH-ubiquinone oxidoreductase 49 kDa subunit
3	3	8.4	46.25	0	20.279	3	NaN	18.8955	NaN	0	2	0	1	NaN	1	0	1	NaN	Afu4g00630	Afu4g00630	Afu4g00630	Has domain(s) with predicted catalytic activity, pyridoxal phosphate binding activity and role in biosynthetic process
2	2	1.3	161.49	0.0015267	11.489	3	NaN	18.7448	NaN	0	2	0	1	NaN	1	0	1	NaN	Afu4g04350	Afu4g04350	Afu4g04350	Ortholog(s) have U2-type spliceosomal complex localization
2	2	3.5	71.446	0	12.334	2	NaN	18.6844	NaN	0	2	0	1	NaN	1	0	1	NaN	Afu4g04680	Afu4g04680	Afu4g04680	FGGY-family carbohydrate kinase;protein induced by heat shock
2	2	5.9	36.326	0.0015823	11.897	4	NaN	20.4318	NaN	0	2	0	1	NaN	1	0	1	NaN	Afu5g02850	Afu5g02850	Afu5g02850	Has domain(s) with predicted arylformamidase activity and role in tryptophan catabolic process to kynurenine
2	2	6.8	61.109	0.0015291	11.496	2	NaN	19.3527	NaN	0	2	0	1	NaN	1	0	1	NaN	Afu5g02930	Afu5g02930	Afu5g02930	Has domain(s) with predicted role in cellular amino acid metabolic process
2	2	3.9	57.274	0	12.404	3	NaN	18.5883	NaN	0	2	0	1	NaN	1	0	1	NaN	Afu5g03330	Afu5g03330	Afu5g03330	Ortholog of A. nidulans FGSC A4 : AN7517, A. niger CBS 513.88 : An09g05650, A. oryzae RIB40 : AO090102000538, Aspergillus wentii : Aspwe1_0043027 and Aspergillus sydowii : Aspsy1_0146077
3	3	4.8	77.01	0	19.387	3	NaN	20.9559	NaN	0	2	0	1	NaN	1	0	1	NaN	Afu5g03480	Afu5g03480	Afu5g03480	Ortholog(s) have methylenetetrahydrofolate reductase (NAD(P)H) activity and role in methionine biosynthetic process, one-carbon metabolic process
2	2	6.3	37.18	0	12.351	2	NaN	18.2216	NaN	0	2	0	1	NaN	1	0	1	NaN	Afu5g06240	Afu5g06240	alcC	Putative zinc-dependent alcohol dehydrogenase, involved in ethanol fermentation;predicted gene pair with adh1;protein induced by hydrogen peroxide;reacts with rabbit immunosera exposed to A. fumigatus conidia
2	2	0.9	243.61	0	12.261	2	NaN	17.027	NaN	0	2	0	1	NaN	1	0	1	NaN	Afu6g08420	Afu6g08420	Afu6g08420	Ortholog(s) have ubiquitin protein ligase activity
2	2	3.6	56.016	0.0015083	11.294	2	NaN	18.5435	NaN	0	2	0	1	NaN	1	0	1	NaN	Afu6g09190	Afu6g09190	Afu6g09190	M24 family metallopeptidase
2	2	7	48.529	0	13.27	3	NaN	19.4448	NaN	0	2	0	1	NaN	1	0	1	NaN	Afu8g00250	Afu8g00250	ftmPT2	Asp Putative prenyltransferase involved in fumitremorgin B biosynthesis

## Sheet: Zn relieved DTG-protein agg
Table S2: Zn2+ responsive proteins: Proteins with increased aggregation following DTG treatment and reduced aggregation when treated with DTG/Zn2+ mixture (Quantitative and Qualitative results)
Peptides	Unique peptides	Sequence coverage [%]	Mol. weight [kDa]	Q-value	Score	MS/MS Count	Mean Control	Mean DTG	Mean DTG_Zn	Valid values Control	Valid values DTG	Valid values DTG_Zn	Student's T-test p-value DTG v Control	Log2(Fold Change) DTG v Control	Student's T-test p-value DTG_Zn v Control	Log2(Fold Change) DTG_Zn v Control	Student's T-test p-value DTG_Zn v DTG	Log2(Fold Change) DTG_Zn v DTG	Protein IDs	Majority protein IDs	Gene Name	Protein Function
10	10	34	37.826	0	115.04	17	21.1348	23.7867	20.4045	3	3	2	0.000209784	2.65192	0.0100718	-0.7303	0.00107744	-3.38222	Afu6g10120	Afu6g10120	Afu6g10120	Ortholog(s) have aldehyde dehydrogenase (NAD) activity, role in response to furfural and mitochondrion, nucleus localization
18	18	37.3	41.479	0	162.47	46	21.7009	24.2278	20.844	3	3	3	0.00444477	2.52685	0.145972	-0.856894	0.00409586	-3.38375	Afu1g06960	Afu1g06960	Afu1g06960	Putative pyruvate dehydrogenase complex subunit alpha;protein induced by hydrogen peroxide;hypoxia induced protein
14	14	34.7	39.791	0	277.79	44	23.374	25.8538	21.6331	3	3	3	0.00214271	2.47984	0.00160081	-1.74085	0.000370038	-4.22069	Afu3g11690	Afu3g11690	Afu3g11690	Putative class II fructose-bisphosphate aldolase;immunoreactive protein;reacts with rabbit immunosera exposed to A. fumigatus conidia;hypoxia induced protein
10	10	24.9	50.255	0	216.67	31	22.5686	24.8866	21.9165	3	3	3	0.013206	2.31802	0.184372	-0.652034	0.00156939	-2.97006	Afu2g04220	Afu2g04220	hmgA	Homogentisate 1,2-dioxygenase involved in L-tyrosine degradation;induced by L-tyrosine;mutants produce less pyomelanin when grown on tyrosine as the sole carbon source;transcript induced by exposure to human airway epithelial cells
8	8	11.4	60.916	0	59.752	16	21.1936	23.4102	20.9619	3	3	3	0.00700041	2.21662	0.293692	-0.231681	0.00399143	-2.4483	Afu6g13540	Afu6g13540	cp3	Carboxypeptidase Y;predicted signal sequence for secretion;transcript up-regulated in conidia exposed to neutrophils;induced by growth on BSA as a sole nitrogen source
9	9	27.8	38.599	0	69.254	16	19.8382	21.9541	NaN	2	3	0	0.00299821	2.11588	1	NaN	1	NaN	Afu1g07040	Afu1g07040	Afu1g07040	Ortholog of A. nidulans FGSC A4 : AN10646, A. niger CBS 513.88 : An07g09600, A. oryzae RIB40 : AO090012000956, Aspergillus wentii : Aspwe1_0111941 and Aspergillus terreus NIH2624 : ATET_02639
12	12	42	31.374	0	131.33	29	21.9233	24.0199	21.1442	3	3	3	0.0140051	2.09657	0.125764	-0.779096	0.00157431	-2.87566	Afu5g08290	Afu5g08290	Afu5g08290	Ortholog(s) have intracellular localization
13	13	26.4	51.132	0	90.879	21	21.0799	23.1593	19.9741	3	3	3	0.0360168	2.07935	0.0188088	-1.10584	0.00681189	-3.18519	Afu4g08760	Afu4g08760	Afu4g08760	Ortholog(s) have 3-deoxy-7-phosphoheptulonate synthase activity
5	5	15.3	43.467	0	38.058	11	20.8126	22.7676	20.6965	2	3	2	0.00109841	1.95503	0.562118	-0.116126	0.000445049	-2.07116	Afu3g01850	Afu3g01850	Afu3g01850	Has domain(s) with predicted protein-arginine deiminase activity and role in putrescine biosynthetic process
10	10	30.8	28.22	0	323.31	30	22.4617	24.4045	21.4371	3	3	3	0.00314243	1.94281	0.00980803	-1.02468	0.000600414	-2.96749	Afu2g15430	Afu2g15430	Afu2g15430	Sorbitol/xylulose reductase
22	22	38	60.501	0	323.31	59	24.0492	25.9618	23.7179	3	3	3	0.000264359	1.91258	0.141084	-0.331339	0.00018749	-2.24391	Afu3g11830	Afu3g11830	pgmA	Putative phosphoglucomutase;reacts with rabbit immunosera exposed to A. fumigatus conidia;hypoxia repressed protein;transcript up-regulated in conidia exposed to neutrophils
12	12	24.2	66.657	0	93.831	19	20.8751	22.763	20.8543	2	3	2	0.0178037	1.88788	0.947682	-0.0207882	0.0230192	-1.90866	Afu4g12920	Afu4g12920	Afu4g12920	Putative mitochondrial histidyl-tRNA synthetase;protein induced by heat shock
5	5	14	45.088	0	49.345	11	20.7321	22.5458	20.8568	3	3	3	0.0269069	1.81366	0.749792	0.124723	0.0141881	-1.68893	Afu6g05120	Afu6g05120	Afu6g05120	Ortholog(s) have protein serine/threonine kinase activity, protein serine/threonine/tyrosine kinase activity, protein tyrosine kinase activity
10	10	29.1	37.66	0	202.78	25	22.0179	23.7963	20.8506	3	3	3	0.00112138	1.77838	0.00143503	-1.16728	0.000106088	-2.94566	Afu7g00700	Afu7g00700	Afu7g00700	Ortholog(s) have oxidoreductase activity, acting on CH-OH group of donors activity and cytosol, nucleus localization
7	7	14	58.147	0	57.131	18	20.2139	21.9611	20.0979	3	3	3	0.00806749	1.74717	0.786126	-0.116039	0.0132985	-1.86321	Afu4g00370	Afu4g00370	Afu4g00370	General amidase;induced by growth on BSA as a sole nitrogen source
18	18	34.3	61.515	0	213.37	35	22.6115	24.331	22.3536	3	3	3	0.00796747	1.71943	0.406405	-0.257942	0.00301507	-1.97737	Afu1g06210	Afu1g06210	agm1	N-acetylphosphoglucosamine mutase, involved in chitin biosynthesis;essential
6	6	43.8	16.054	0	135.7	27	22.4214	24.103	21.912	3	3	2	0.0162978	1.68164	0.3061	-0.509388	0.0161056	-2.19102	Afu8g00400	Afu8g00400	Afu8g00400	Protein of unknown function;encoded in the fma (fumagillin) secondary metabolite gene cluster
13	13	13.3	118.56	0	118.38	20	20.5403	22.2197	20.7597	3	3	2	0.00711083	1.67939	0.61045	0.219337	0.0382525	-1.46006	Afu4g07910	Afu4g07910	Afu4g07910	Putative zinc-dependent peptidase
5	5	14.5	54.209	0	44.757	12	21.2559	22.928	21.0951	3	3	3	0.0106901	1.67216	0.580785	-0.160779	0.00749062	-1.83294	Afu2g05910	Afu2g05910	hxkA	Putative hexokinase;protein induced by heat shock
7	7	33.2	23.428	0	50.297	15	21.0748	22.689	20.3047	3	3	2	0.00541068	1.61415	0.252318	-0.77016	0.0138418	-2.38431	Afu1g14410	Afu1g14410	rpl17	60S ribosomal protein L17
7	7	16.9	36.858	0	129.84	21	23.0648	24.6658	22.7969	3	3	3	0.00170169	1.601	0.136559	-0.267934	0.00091396	-1.86894	Afu5g06390	Afu5g06390	Afu5g06390	Putative adenosine kinase
5	5	12.4	56.541	0	42.839	10	19.8982	21.4884	NaN	3	3	0	0.0155013	1.59017	1	NaN	1	NaN	Afu3g03020	Afu3g03020	Afu3g03020	Putative phosphoglucomutase
9	9	20	51.671	0	105.3	17	20.8983	22.4421	20.7794	3	3	3	0.0194373	1.54387	0.783109	-0.118895	0.0260658	-1.66277	Afu1g10780	Afu1g10780	Afu1g10780	Glycine cleavage system T protein;SrbA-regulated during hypoxia
16	16	21	74.789	0	178.35	39	22.5565	24.0816	22.9549	3	3	3	0.0049302	1.52512	0.264511	0.398413	0.033283	-1.12671	Afu7g05930	Afu7g05930	mepB	Putative metallopeptidase with similarity to mammalian thimet oligopeptidases;conidia-enriched protein;transcript induced by exposure to human airway epithelial cells and by growth on BSA as a sole nitrogen source
15	15	32.5	50.352	0	161.46	50	22.7579	24.2561	22.5777	3	3	3	0.0120434	1.49821	0.484185	-0.180148	0.0138955	-1.67836	Afu5g08930	Afu5g08930	Afu5g08930	Putative isovaleryl-CoA dehydrogenase;ortholog of A. nidulans ivdA;transcript induced by exposure to human airway epithelial cells
14	14	46.8	38.322	0	148.44	32	23.1035	24.5846	22.6385	3	3	3	0.00904509	1.4811	0.234174	-0.464959	0.00962047	-1.94605	Afu5g02470	Afu5g02470	nmt1	Thiamine biosynthesis protein, phoB-regulated;protein induced by H2O2;reacts with rabbit immunosera exposed to conidia;hypoxia induced protein;transcript induced by exposure to human airway epithelial cells;induced by gliotoxin
3	3	7.8	46.227	0	39.162	11	19.8201	21.2905	NaN	2	3	0	0.014424	1.47034	1	NaN	1	NaN	Afu3g07680	Afu3g07680	Afu3g07680	Putative ran GTPase activating protein
9	9	21.8	60.185	0	214.19	25	22.0132	23.4503	20.9827	3	3	2	0.0364146	1.43711	0.0697527	-1.0305	0.0197879	-2.46761	Afu8g04090;Afu1g00460	Afu8g04090;Afu1g00460	codA	Putative choline oxidase;AFUB_083470 choA ortholog;Afu1g00460 Afu1g00460 Ortholog(s) have intracellular localization
7	7	17.9	46.648	0	51.371	10	20.5841	21.9793	20.4461	2	3	2	0.00718362	1.39524	0.634623	-0.137925	0.0101675	-1.53317	Afu1g15450	Afu1g15450	Afu1g15450	Ortholog(s) have adenylosuccinate synthase activity, sulfinylpropanyl adenylate synthase activity, role in de novo AMP biosynthetic process, cellular response to cadmium ion, fumarate metabolic process and cytosol, nucleus localizat
10	10	28.2	43.478	0	102.35	29	22.3353	23.6451	21.715	3	3	3	0.00456772	1.30981	0.0170514	-0.620259	0.00151203	-1.93007	Afu1g09800	Afu1g09800	Afu1g09800	Ortholog of S. cerevisiae OLA1;snoRNA Afu-304 encoded within intron 2
20	20	48	46.997	0	323.31	50	23.8114	25.1029	23.0378	3	3	3	0.0240009	1.29147	0.00582558	-0.773591	0.00575491	-2.06506	Afu4g10410	Afu4g10410	Afu4g10410	Putative aspartate aminotransferase;reacts with rabbit immunosera exposed to A. fumigatus conidia;hypoxia induced protein;transcript induced in conidia exposed to neutrophils or to human airway epithelial cells
13	13	28.6	46.133	0	101.08	30	21.9082	23.1749	22.0339	3	3	3	0.00785525	1.26667	0.748104	0.125626	0.0169636	-1.14104	Afu2g04310	Afu2g04310	Afu2g04310	Argininosuccinate synthase;hypoxia induced protein
17	17	25	80.723	0	139.46	36	22.0853	23.3343	21.9892	3	3	3	0.00140318	1.24896	0.640174	-0.0961577	0.00274011	-1.34512	Afu2g14030	Afu2g14030	Afu2g14030	Ortholog(s) have arginine-tRNA ligase activity, role in arginyl-tRNA aminoacylation and cytosol, mitochondrion localization
13	13	31.3	51.182	0	195.87	46	23.9752	25.2205	24.1103	3	3	3	0.000968464	1.24533	0.267989	0.135041	0.00252694	-1.11029	Afu2g09650;Afu6g02490;Afu1g04160	Afu2g09650	Afu2g09650	Aspartate transaminase;induced by L-tyrosine;transcript up-regulated in conidia exposed to neutrophils
3	3	5.3	59.479	0	24.78	8	20.5077	21.7425	20.377	2	3	2	0.0244417	1.23483	0.460904	-0.130674	0.0220919	-1.3655	Afu3g12690	Afu3g12690	glfA	Putative UDP-galactopyranose mutase, enzyme in the first step of galactofuranose biosynthesis;mutant unmasks mannan residues on the cell surface, which is thought to contribute to increased cell adhesion
18	18	42.7	62.104	0	323.31	41	23.4069	24.602	23.0351	3	3	3	0.0312406	1.19507	0.236176	-0.37182	0.0131342	-1.56689	Afu6g03730	Afu6g03730	Afu6g03730	2-methylcitrate dehydratase;hypoxia repressed protein;transcript up-regulated in conidia exposed to neutrophils and to human airway epithelial cells;no human homolog
9	9	16.1	65.33	0	60.376	21	22.1466	23.2867	21.7142	3	3	3	0.0107013	1.14011	0.0647336	-0.432372	0.00226029	-1.57248	Afu4g00610	Afu4g00610	Afu4g00610	Putative aryl-alcohol dehydrogenase
14	14	42.2	25.586	0	323.31	51	23.5501	24.6883	22.8535	3	3	3	0.0129866	1.13819	0.0356953	-0.696639	0.00151046	-1.83482	Afu2g09210	Afu2g09210	Afu2g09210	60S ribosomal protein L10;reacts with rabbit immunosera exposed to A. fumigatus conidia
45	45	56.8	86.893	0	323.31	168	25.993	27.1245	25.3551	3	3	3	0.00270219	1.13148	0.00432754	-0.637922	0.000313728	-1.7694	Afu4g07360	Afu4g07360	metH	Putative cobalamin-independent methionine synthase;protein induced by heat shock;Yap1-dependent induction in response to hydrogen peroxide;reacts with rabbit immunosera exposed to A. fumigatus conidia;no human homolog
11	11	7.5	152.28	0	156.45	23	21.7402	22.8409	21.3053	3	3	3	0.00622261	1.10067	0.259822	-0.434944	0.0052017	-1.53561	Afu1g11420	Afu1g11420	Afu1g11420	Ortholog(s) have mRNA 3-UTR binding, mRNA 5-UTR binding, translation repressor activity, nucleic acid binding activity
5	5	9.6	67.112	0	48.678	14	21.8811	22.933	21.4316	3	3	3	0.0464391	1.05196	0.0814432	-0.449448	0.0119437	-1.5014	Afu4g11720	Afu4g11720	Afu4g11720	Putative phosphatidyl synthase;protein levels increase in response to pkaC overexpression
12	12	28.1	56.715	0	96.425	23	21.9105	22.9594	21.1391	3	3	2	0.00633385	1.04889	0.0407331	-0.771421	0.00897533	-1.82031	Afu7g02180	Afu7g02180	Afu7g02180	Ortholog(s) have UDP-N-acetylglucosamine diphosphorylase activity, role in UDP-N-acetylglucosamine biosynthetic process and cytosol, nucleus localization
7	7	12.5	58.936	0	57.102	11	21.2797	22.3234	NaN	3	3	0	0.047367	1.04365	1	NaN	1	NaN	Afu3g08470	Afu3g08470	Afu3g08470	Glucose-6-phosphate 1-dehydrogenase
4	4	8.4	64.991	0	32.3	9	NaN	21.2206	NaN	0	3	0	1	NaN	1	0	1	NaN	Afu1g03550	Afu1g03550	ilv3B	Putative mitochondrial dihydroxy acid dehydratase;SrbA-regulated during hypoxia
3	3	10	39.459	0	22.035	9	NaN	21.2142	NaN	0	3	0	1	NaN	1	0	1	NaN	Afu1g13370	Afu1g13370	Afu1g13370	Putative aldo-keto reductase;transcript up-regulated in conidia exposed to neutrophils
3	3	13.4	30.397	0	19.618	4	NaN	19.6805	NaN	0	3	0	1	NaN	1	0	1	NaN	Afu2g02490	Afu2g02490	Afu2g02490	Ortholog of A. nidulans FGSC A4 : AN0401, Aspergillus flavus NRRL 3357 : AFL2T_08730, Aspergillus versicolor : Aspve1_0035846 and Aspergillus fumigatus A1163 : AFUB_019590
3	3	9.3	54.725	0	62.351	7	NaN	21.7938	NaN	0	3	0	1	NaN	1	0	1	NaN	Afu2g11940	Afu2g11940	ade13	Adenylosuccinate lyase;reacts with rabbit immunosera exposed to A. fumigatus conidia
2	2	7	32.365	0	13.025	3	NaN	19.9853	NaN	0	3	0	1	NaN	1	0	1	NaN	Afu2g13470	Afu2g13470	Afu2g13470	Ortholog(s) have nucleotidase activity, role in pyrimidine nucleobase metabolic process and cytosol, nucleus localization
3	3	6.8	58.073	0	17.97	4	NaN	20.3248	NaN	0	3	0	1	NaN	1	0	1	NaN	Afu2g13630	Afu2g13630	aro8	Putative amino transferase;immunoreactive protein;transcript induced by exposure to human airway epithelial cells and by growth on BSA as a sole nitrogen source
2	2	4.5	60.059	0	14.763	3	NaN	18.6687	NaN	0	3	0	1	NaN	1	0	1	NaN	Afu4g08600	Afu4g08600	Afu4g08600	Putative aldehyde dehydrogenase (NAD(P)+)
2	2	3.7	68.281	0	19.223	4	NaN	20.2846	NaN	0	3	0	1	NaN	1	0	1	NaN	Afu4g09010	Afu4g09010	Afu4g09010	Ortholog(s) have U1 snRNP localization
2	2	3.9	56.569	0	17.345	6	NaN	20.3883	NaN	0	3	0	1	NaN	1	0	1	NaN	Afu4g10330	Afu4g10330	Afu4g10330	Ortholog(s) have protein farnesyltransferase activity, role in protein farnesylation and cytosol, nucleus, protein farnesyltransferase complex localization
2	2	4.4	60.382	0	12.35	3	NaN	19.5024	NaN	0	3	0	1	NaN	1	0	1	NaN	Afu5g02230	Afu5g02230	Afu5g02230	Putative actin interacting protein;protein induced by hydrogen peroxide
5	5	19.4	41.977	0	63.467	6	NaN	21.771	NaN	0	3	0	1	NaN	1	0	1	NaN	Afu6g12480	Afu6g12480	nif3	NGG1 interacting factor
4	4	10.7	53.848	0	23.213	4	NaN	20.0649	NaN	0	2	0	1	NaN	1	0	1	NaN	Afu1g07200	Afu1g07200	Afu1g07200	Has domain(s) with predicted catalytic activity, heme binding, oxidoreductase activity
2	2	5.3	55.222	0	12.692	2	NaN	18.9401	NaN	0	2	0	1	NaN	1	0	1	NaN	Afu1g14920	Afu1g14920	Afu1g14920	Putative peptidase D;induced by growth on BSA as a sole nitrogen source
2	2	2.9	38.185	0.001506	11.23	2	NaN	19.5306	NaN	0	2	0	1	NaN	1	0	1	NaN	Afu1g17040	Afu1g17040	Afu1g17040	Ortholog(s) have cytosol, nucleus localization
2	2	4.5	49.387	0	13.284	2	NaN	19.5117	NaN	0	2	0	1	NaN	1	0	1	NaN	Afu2g01220	Afu2g01220	Afu2g01220	Putative GTP cyclohydrolase II;transcript up-regulated in conidia exposed to neutrophils
4	4	17.3	25.311	0	26.412	5	NaN	20.2328	NaN	0	2	0	1	NaN	1	0	1	NaN	Afu2g04240	Afu2g04240	maiA	maleylacetoacetate isomerase involved in L-tyrosine degradation
2	2	4.2	72.832	0	19.306	2	NaN	19.3157	NaN	0	2	0	1	NaN	1	0	1	NaN	Afu2g08280	Afu2g08280	maeA	Putative NADP-dependent malic enzyme
2	2	4.3	52.855	0.0015699	11.87	2	NaN	17.619	NaN	0	2	0	1	NaN	1	0	1	NaN	Afu2g13710	Afu2g13710	Afu2g13710	NADH-ubiquinone oxidoreductase 49 kDa subunit
3	3	8.4	46.25	0	20.279	3	NaN	18.8955	NaN	0	2	0	1	NaN	1	0	1	NaN	Afu4g00630	Afu4g00630	Afu4g00630	Has domain(s) with predicted catalytic activity, pyridoxal phosphate binding activity and role in biosynthetic process
2	2	1.3	161.49	0.0015267	11.489	3	NaN	18.7448	NaN	0	2	0	1	NaN	1	0	1	NaN	Afu4g04350	Afu4g04350	Afu4g04350	Ortholog(s) have U2-type spliceosomal complex localization
2	2	3.5	71.446	0	12.334	2	NaN	18.6844	NaN	0	2	0	1	NaN	1	0	1	NaN	Afu4g04680	Afu4g04680	Afu4g04680	FGGY-family carbohydrate kinase;protein induced by heat shock
2	2	5.9	36.326	0.0015823	11.897	4	NaN	20.4318	NaN	0	2	0	1	NaN	1	0	1	NaN	Afu5g02850	Afu5g02850	Afu5g02850	Has domain(s) with predicted arylformamidase activity and role in tryptophan catabolic process to kynurenine
2	2	6.8	61.109	0.0015291	11.496	2	NaN	19.3527	NaN	0	2	0	1	NaN	1	0	1	NaN	Afu5g02930	Afu5g02930	Afu5g02930	Has domain(s) with predicted role in cellular amino acid metabolic process
2	2	3.9	57.274	0	12.404	3	NaN	18.5883	NaN	0	2	0	1	NaN	1	0	1	NaN	Afu5g03330	Afu5g03330	Afu5g03330	Ortholog of A. nidulans FGSC A4 : AN7517, A. niger CBS 513.88 : An09g05650, A. oryzae RIB40 : AO090102000538, Aspergillus wentii : Aspwe1_0043027 and Aspergillus sydowii : Aspsy1_0146077
3	3	4.8	77.01	0	19.387	3	NaN	20.9559	NaN	0	2	0	1	NaN	1	0	1	NaN	Afu5g03480	Afu5g03480	Afu5g03480	Ortholog(s) have methylenetetrahydrofolate reductase (NAD(P)H) activity and role in methionine biosynthetic process, one-carbon metabolic process
2	2	6.3	37.18	0	12.351	2	NaN	18.2216	NaN	0	2	0	1	NaN	1	0	1	NaN	Afu5g06240	Afu5g06240	alcC	Putative zinc-dependent alcohol dehydrogenase, involved in ethanol fermentation;predicted gene pair with adh1;protein induced by hydrogen peroxide;reacts with rabbit immunosera exposed to A. fumigatus conidia
2	2	0.9	243.61	0	12.261	2	NaN	17.027	NaN	0	2	0	1	NaN	1	0	1	NaN	Afu6g08420	Afu6g08420	Afu6g08420	Ortholog(s) have ubiquitin protein ligase activity
2	2	3.6	56.016	0.0015083	11.294	2	NaN	18.5435	NaN	0	2	0	1	NaN	1	0	1	NaN	Afu6g09190	Afu6g09190	Afu6g09190	M24 family metallopeptidase
2	2	7	48.529	0	13.27	3	NaN	19.4448	NaN	0	2	0	1	NaN	1	0	1	NaN	Afu8g00250	Afu8g00250	ftmPT2	Asp Putative prenyltransferase involved in fumitremorgin B biosynthesis
